# Supplementary material for: Global food insecurity and famine from reduced crop, marine fishery and livestock production due to climate disruption from nuclear war soot injection
Source: Springer Nature journal article supplement (doi:10.1038/s43016-022-00573-0), 2022-08-15
Supplement: 43016_2022_573_MOESM1_ESM.pdf [file 43016_2022_573_MOESM1_ESM.pdf]

---

**Supplementary information**

---

**Global food insecurity and famine from reduced crop, marine fishery and livestock production due to climate disruption from nuclear war soot injection**

---

In the format provided by the authors and unedited

## Supplemental Material for

### **Global food insecurity and famine from reduced crop, marine fishery and livestock production due to climate disruption from nuclear war soot injection**

Lili Xia<sup>1</sup>, Alan Robock<sup>1</sup>, Kim Scherrer<sup>2</sup>, Cheryl S. Harrison<sup>3</sup>, Benjamin Leon Bodirsky<sup>4,5</sup>, Isabelle Weindl<sup>4</sup>, Jonas Jägermeyr<sup>4,6,7</sup>, Charles G. Bardeen<sup>8</sup>, Owen B. Toon<sup>9</sup>, and Ryan Henseghan<sup>10</sup>

<sup>1</sup>Department of Environmental Sciences, Rutgers University, New Brunswick, NJ, USA

<sup>2</sup>Institut de Ciència i Tecnologia Ambientals, Universitat Autònoma de Barcelona, Cerdanyola del Vallès, Spain (Now at: Department of Biological Sciences, University of Bergen, Bergen, Norway)

<sup>3</sup>Department of Ocean and Coastal Science, Center for Computation and Technology, Louisiana State University, Baton Rouge, Louisiana, USA

<sup>4</sup>Potsdam Institute for Climate Impact Research, Potsdam, Germany

<sup>5</sup>World Vegetable Center, P.O. Box 42, Shanhua, Tainan, Taiwan

<sup>6</sup>NASA Goddard Institute for Space Studies, New York, NY, USA

<sup>7</sup>Center for Climate Systems Research, Columbia University, New York, NY, USA

<sup>8</sup>National Center for Atmospheric Research, Boulder, CO, USA

<sup>9</sup>Laboratory for Atmospheric and Space Physics, Department of Atmospheric and Ocean Sciences, University of Colorado, Boulder, CO, USA

<sup>10</sup>School of Mathematical Sciences, Queensland University of Technology, Brisbane, QLD, Australia

## Table of Contents

- Table S1. Calorie reduction from the major food crops and marine fish in nations with nuclear weapons.
- Table S2. Calorie reduction from the major food crops and marine fish in all nations calculated.
- Table S3. Assumptions for the *Livestock*, *Partial Livestock*, and *No Livestock* cases.
- Table S4. Number of people who would die from starvation after the simulated nuclear war in Year 2 for all nations for the *Livestock* case with trade off.
- Table S5. Number of people who would die from starvation after the simulated nuclear war in Year 2 for all nations for the *Partial Livestock* case with trade off.
- Table S6. Number of people who would die from starvation after the simulated nuclear war in Year 2 for all nations for the *No Livestock* case with trade off.
- Table S7. Number of people who would die from starvation after the simulated nuclear war in Year 2 for all nations for the *Livestock* case with trade on.
- Table S8. Number of people who would die from starvation after the simulated nuclear war in Year 2 for all nations for the *Partial Livestock* case with trade on.
- Table S9. Number of people who would die from starvation after the simulated nuclear war in Year 2 for all nations for the *No Livestock* case with trade on.
- Figure S1. Cropland mask used to produce Figure 1 in the main text.
- Figure S2. Global average production changes of maize, rice, spring wheat and soybean in CLM5crop and six other crop models under the 5 Tg scenario.
- Figure S3. Global average protein supply change in simulated crops, marine capture, and livestock.
- Figure S4. Change in calorie content of food in all combined explicitly simulated agricultural crops and wild-caught marine fisheries.
- Figure S5. National population starving with no food support if the rest of the population is provided calorie intake to support normal physical activity in Year 2 after different nuclear war soot injections.
- Figure S6. National population percentage starving with no food support if the rest of the population is provided calorie intake to support normal physical activity in Year 2 after different nuclear war soot injections.
- Figure S7. Global calorie intake and population starving under the *Livestock* and *No Livestock* Cases
- Figure S8. Global average calorie change (%) of main crops (rice, maize, wheat and soybean) under the 5 Tg case (three ensemble members).

**Table S1.** Changes in calorie production (%) from the major food crops (maize, rice, soybean and spring wheat) and marine fish in Year 2 after simulated nuclear wars for the nations with nuclear weapons and the global average for all nations calculated. China here includes Mainland China, Hong Kong, and Macao. Bold is used for headings and global averages.

| <b>Nations</b>        | <b>5 Tg</b> | <b>16 Tg</b> | <b>27 Tg</b> | <b>37 Tg</b> | <b>47 Tg</b> | <b>150 Tg</b> |
|-----------------------|-------------|--------------|--------------|--------------|--------------|---------------|
| China                 | -14.2       | -47.7        | -64.2        | -77.4        | -82.8        | -98.6         |
| France                | -7.1        | -22.9        | -25.4        | -31.9        | -35.1        | -99.8         |
| India                 | -4.4        | -2.1         | -0.9         | -6.0         | -19.1        | -65.2         |
| Israel                | 0.9         | -1.7         | -6.6         | -9.2         | -24.9        | -87.9         |
| North Korea           | -18.1       | -89.0        | -91.1        | -98.6        | -98.9        | -99.4         |
| Pakistan              | -2.2        | 25.4         | 24.4         | -10.3        | -12.3        | -81.8         |
| Russia                | 6.0         | -64.3        | -84.2        | -90.1        | -90.3        | -99.3         |
| United Kingdom        | 1.0         | -33.8        | -45.3        | -64.7        | -82.0        | -99.6         |
| United States         | -13.8       | -50.6        | -67.0        | -81.2        | -90.2        | -99.7         |
| <b>Global Average</b> | <b>-6.9</b> | <b>-22.7</b> | <b>-32.8</b> | <b>-41.1</b> | <b>-48.0</b> | <b>-81.6</b>  |

**Table S2.** Changes in calorie production (%) from the major food crops (maize, rice, soybean and spring wheat) and marine fish in Year 2 after simulated nuclear wars for all nations calculated. China here includes Mainland China, Hong Kong, and Macao. Bold is used for headings and global averages.

| <b>Nation</b>            | <b>5 Tg</b> | <b>16 Tg</b> | <b>27 Tg</b> | <b>37 Tg</b> | <b>47 Tg</b> | <b>150 Tg</b> |
|--------------------------|-------------|--------------|--------------|--------------|--------------|---------------|
| Afghanistan              | -16.9       | -22.3        | -27.1        | -29.2        | -32.9        | -100.0        |
| Albania                  | -12.0       | 24.3         | 12.7         | -18.5        | -13.1        | -98.5         |
| Algeria                  | -6.2        | 39.8         | 16.2         | 119.7        | 312.5        | -61.3         |
| Angola                   | 1.3         | -9.5         | -20.3        | -24.4        | -37.5        | -67.3         |
| Antigua and Barbuda      | -2.6        | -7.4         | -6.8         | -6.3         | -7.3         | -17.1         |
| Argentina                | -2.5        | 7.4          | -7.5         | -18.4        | -32.7        | -73.9         |
| Armenia                  | 13.9        | 4.7          | -1.2         | -3.3         | -35.3        | -99.5         |
| Australia                | -7.7        | -20.7        | 7.4          | 32.2         | 36.0         | 24.2          |
| Austria                  | -33.9       | -63.9        | -70.1        | -93.4        | -91.9        | -100.0        |
| Azerbaijan               | 5.4         | -11.9        | -13.1        | -18.1        | -28.7        | -100.0        |
| Bahamas                  | -0.6        | 0.0          | -4.5         | -5.4         | -6.6         | -26.3         |
| Bangladesh               | -3.7        | 24.7         | 63.0         | 24.5         | 9.2          | -96.6         |
| Barbados                 | -2.7        | -9.2         | -11.4        | -10.6        | -11.1        | -14.5         |
| Belarus                  | 50.2        | 11.5         | -45.6        | -95.4        | -99.5        | -99.9         |
| Belgium                  | -18.5       | -35.8        | -37.2        | -52.2        | -68.3        | -99.8         |
| Belize                   | -1.5        | -3.4         | -4.4         | -3.6         | -11.2        | -47.1         |
| Benin                    | 7.4         | -9.5         | 0.7          | -6.1         | 1.7          | -60.4         |
| Bermuda                  | -2.7        | -3.8         | -8.3         | -15.2        | -19.2        | -57.0         |
| Bolivia                  | -4.1        | -17.2        | -28.5        | -38.3        | -41.6        | -72.6         |
| Bosnia and Herzegovina   | -33.8       | -25.2        | -64.4        | -80.0        | -79.8        | -99.9         |
| Botswana                 | 17.5        | -3.2         | -2.9         | -13.1        | -24.5        | -71.5         |
| Brazil                   | -5.8        | -2.8         | -12.6        | -22.5        | -31.3        | -67.1         |
| Brunei                   | 0.1         | -1.3         | -2.3         | -3.0         | -4.4         | -10.4         |
| Bulgaria                 | -7.9        | 18.3         | 6.1          | -21.8        | -6.7         | -100.0        |
| Burkina Faso             | 3.3         | -7.7         | -3.1         | 3.8          | -6.3         | -70.3         |
| Cambodia                 | -22.4       | -22.1        | -12.9        | -27.6        | -51.3        | -95.0         |
| Cameroon                 | 2.1         | -8.4         | -16.0        | -13.5        | -18.1        | -82.3         |
| Canada                   | -32.4       | -80.1        | -96.2        | -99.4        | -99.5        | -99.8         |
| Cape Verde               | -1.0        | -4.5         | -5.0         | -6.0         | -7.0         | -11.8         |
| Central African Republic | -1.7        | -6.7         | -23.4        | -21.3        | -27.3        | -79.8         |
| Chad                     | 1.9         | 11.9         | 19.2         | 5.2          | 42.6         | -69.3         |
| Chile                    | 16.3        | -17.2        | 4.4          | 5.2          | -15.4        | -63.7         |
| China                    | -14.2       | -47.7        | -64.2        | -77.4        | -82.8        | -98.6         |
| Colombia                 | -6.6        | -9.5         | -19.4        | -28.1        | -33.2        | -85.9         |
| Republic of Congo        | 2.7         | 6.0          | -6.3         | -7.9         | -11.1        | -43.2         |
| Costa Rica               | -31.0       | 286.8        | 68.2         | 281.7        | 157.0        | 228.6         |
| Croatia                  | -16.6       | -24.4        | -47.2        | -72.0        | -72.0        | -99.8         |
| Cuba                     | 15.3        | 35.0         | 17.9         | 16.1         | 4.1          | -69.3         |
| Cyprus                   | 2.6         | -2.1         | 9.0          | 29.0         | 73.2         | -66.8         |
| Czech Republic           | -8.6        | -23.3        | -35.4        | -93.7        | -88.1        | -99.6         |

| <b>Nation</b>      | <b>5 Tg</b> | <b>16 Tg</b> | <b>27 Tg</b> | <b>37 Tg</b> | <b>47 Tg</b> | <b>150 Tg</b> |
|--------------------|-------------|--------------|--------------|--------------|--------------|---------------|
| Denmark            | 48.4        | 0.1          | -76.2        | -97.2        | -97.4        | -98.5         |
| Dominica           | -2.4        | -7.4         | -8.1         | -8.3         | -9.0         | -12.3         |
| Dominican Republic | 13.0        | 77.1         | 38.5         | 59.1         | 39.0         | -30.7         |
| Ecuador            | -5.5        | -12.2        | -15.2        | -15.1        | -21.2        | -68.3         |
| Egypt              | -0.1        | -3.3         | -3.8         | -11.8        | -20.7        | -82.7         |
| El Salvador        | 2.2         | 33.0         | 26.4         | 20.7         | 11.0         | -79.7         |
| Estonia            | 75.3        | -72.2        | -96.2        | -96.4        | -96.6        | -98.2         |
| Ethiopia           | -1.4        | -17.0        | -31.4        | -37.3        | -55.4        | -90.5         |
| Fiji               | -3.4        | -2.7         | -3.3         | -4.5         | -3.2         | -10.1         |
| Finland            | -48.2       | -96.7        | -97.1        | -97.1        | -97.3        | -98.5         |
| France             | -7.1        | -22.9        | -25.4        | -31.9        | -35.1        | -99.8         |
| French Polynesia   | -3.9        | -4.9         | -5.7         | -5.6         | -10.1        | -23.0         |
| Gabon              | -2.0        | 0.4          | -14.8        | -13.6        | -17.7        | -61.1         |
| Gambia             | -6.1        | -56.8        | -27.2        | 10.6         | -29.4        | 843.0         |
| Georgia            | 5.6         | -21.1        | -49.9        | -64.9        | -69.0        | -98.3         |
| Germany            | -5.6        | -35.9        | -37.1        | -84.9        | -86.4        | -99.9         |
| Ghana              | 5.9         | -8.3         | -4.7         | -9.5         | -2.6         | -67.1         |
| Greece             | -9.4        | 40.8         | 35.7         | 7.9          | 9.4          | -96.4         |
| Grenada            | -15.7       | -28.5        | -29.4        | -28.5        | -29.0        | -30.5         |
| Guatemala          | 0.9         | 5.0          | -0.1         | 2.8          | -10.1        | -82.6         |
| Guinea             | -7.0        | -2.8         | -4.6         | 12.8         | 6.7          | -81.3         |
| Guinea-Bissau      | -3.9        | 2.6          | 28.5         | 26.7         | 24.3         | -13.9         |
| Guyana             | 28.1        | 127.8        | 93.4         | 87.8         | 86.6         | -4.8          |
| Haiti              | 86.4        | 453.8        | 376.6        | 370.6        | 294.6        | 23.7          |
| Honduras           | -1.2        | 8.3          | 10.7         | 5.9          | -4.2         | -74.4         |
| Hungary            | -13.8       | -56.6        | -64.1        | -81.3        | -83.1        | -99.9         |
| Iceland            | -9.0        | -18.2        | -29.1        | -33.4        | -35.6        | -64.5         |
| India              | -4.4        | -2.1         | 0.9          | -6.0         | -19.1        | -65.2         |
| Indonesia          | -2.4        | -1.5         | -13.9        | -17.1        | -26.9        | -64.5         |
| Iran               | -8.9        | -15.8        | -30.0        | -34.2        | -37.9        | -98.0         |
| Iraq               | -2.8        | -0.6         | -12.2        | -28.4        | -26.8        | -99.3         |
| Ireland            | 9.1         | -26.0        | -32.5        | -45.6        | -68.3        | -97.4         |
| Israel             | 0.9         | -1.7         | -6.6         | -9.2         | -24.9        | -87.9         |
| Italy              | -10.1       | -17.8        | -29.7        | -52.2        | -49.9        | -98.3         |
| Jamaica            | 17.9        | 94.2         | 90.2         | 78.5         | 49.3         | -16.7         |
| Japan              | -7.3        | -50.0        | -66.9        | -79.6        | -84.7        | -93.4         |
| Jordan             | 2.2         | -0.6         | -5.4         | -10.8        | -32.0        | -96.9         |
| Kazakhstan         | -11.0       | -22.4        | -48.7        | -71.1        | -88.9        | -99.9         |
| Kenya              | -4.0        | -20.1        | -25.0        | -34.2        | -42.4        | -84.9         |
| Kiribati           | -4.8        | -10.9        | -12.7        | -17.2        | -19.4        | -31.9         |
| Kuwait             | -0.4        | -9.5         | -6.3         | -16.5        | -18.5        | -93.7         |
| Kyrgyzstan         | -7.5        | -29.8        | -53.2        | -70.4        | -88.0        | -100.0        |
| Laos               | -18.1       | -44.8        | -51.5        | -55.2        | -64.9        | -99.0         |
| Latvia             | 78.6        | -20.6        | -93.9        | -98.0        | -98.0        | -99.0         |
| Lebanon            | 0.9         | -8.0         | -8.1         | 2.1          | 7.3          | -76.3         |

| <b>Nation</b>                    | <b>5 Tg</b> | <b>16 Tg</b> | <b>27 Tg</b> | <b>37 Tg</b> | <b>47 Tg</b> | <b>150 Tg</b> |
|----------------------------------|-------------|--------------|--------------|--------------|--------------|---------------|
| Lesotho                          | 0.7         | -33.7        | -41.5        | -46.7        | -63.2        | -89.4         |
| Liberia                          | -3.5        | 7.6          | 8.2          | -3.9         | 5.4          | -79.0         |
| Lithuania                        | 65.5        | 12.2         | -70.0        | -98.9        | -98.9        | -99.4         |
| Luxembourg                       | -2.7        | -17.6        | -19.2        | -43.5        | -57.5        | -100.0        |
| Madagascar                       | -0.8        | 3.1          | -15.9        | -12.0        | -27.9        | -62.6         |
| Malawi                           | 6.5         | 4.2          | -10.5        | -23.3        | -41.5        | -69.3         |
| Malaysia                         | 0.7         | -6.3         | -16.3        | -11.0        | -14.8        | -60.2         |
| Maldives                         | -2.7        | 5.4          | 4.4          | -0.6         | -6.0         | -8.9          |
| Mali                             | -11.5       | -16.8        | -13.9        | 8.5          | -15.4        | -78.2         |
| Malta                            | 0.2         | 0.2          | 0.0          | -0.4         | -0.8         | -3.1          |
| Mauritania                       | -18.5       | -28.6        | -12.1        | -12.3        | -13.8        | -53.5         |
| Mauritius                        | -1.8        | -0.9         | -5.1         | -3.3         | -5.6         | -23.7         |
| Mexico                           | -8.0        | -25.5        | -37.9        | -44.8        | -57.3        | -93.9         |
| Moldova                          | -8.1        | -42.6        | -60.5        | -79.7        | -81.0        | -99.9         |
| Mongolia                         | -25.8       | -70.0        | -98.9        | -99.9        | -100.0       | -100.0        |
| Montenegro                       | -20.4       | -8.6         | -51.3        | -69.4        | -67.8        | -98.5         |
| Morocco                          | -10.6       | 39.3         | 5.7          | 87.9         | 95.4         | -83.5         |
| Mozambique                       | 23.1        | -3.5         | 3.1          | -3.1         | -18.3        | -51.7         |
| Myanmar                          | -6.3        | -25.3        | -44.9        | -59.0        | -74.2        | -97.9         |
| Namibia                          | 4.0         | -21.4        | -15.6        | -21.4        | -15.2        | -50.7         |
| Nepal                            | -11.8       | -32.5        | -39.2        | -49.4        | -64.2        | -97.5         |
| Netherlands                      | 7.7         | -32.6        | -32.8        | -55.9        | -76.3        | -97.3         |
| New Caledonia                    | -0.8        | -0.5         | -1.0         | -1.2         | -1.9         | -3.6          |
| New Zealand                      | -7.9        | -6.1         | -14.3        | -24.2        | -25.0        | -60.9         |
| Nicaragua                        | -4.0        | 5.8          | -5.5         | -5.4         | -12.6        | -73.4         |
| Niger                            | -5.1        | 11.9         | 41.0         | 48.0         | 45.0         | -67.7         |
| Nigeria                          | 2.0         | -5.6         | 1.2          | -6.0         | 4.2          | -67.0         |
| North Korea                      | -18.1       | -89.0        | -91.1        | -98.6        | -98.9        | -99.4         |
| Norway                           | -24.0       | -44.5        | -49.0        | -51.6        | -53.6        | -74.7         |
| Oman                             | -2.3        | 11.8         | -4.8         | 8.8          | -8.9         | 36.0          |
| Pakistan                         | -2.2        | 25.4         | 24.4         | -10.3        | -12.3        | -81.8         |
| Panama                           | -14.2       | 161.8        | 43.9         | 134.5        | 141.7        | 55.3          |
| Paraguay                         | 2.4         | -0.3         | -4.0         | -13.6        | -30.6        | -77.2         |
| Peru                             | -1.6        | -15.5        | -23.1        | -26.2        | -31.3        | -64.2         |
| Philippines                      | -4.2        | -20.8        | -6.1         | -6.7         | -2.1         | -51.9         |
| Poland                           | 24.5        | -5.8         | -19.3        | -94.0        | -92.2        | -99.9         |
| Portugal                         | 4.3         | -10.4        | -35.1        | -49.2        | -62.0        | -96.5         |
| Romania                          | -10.0       | -40.6        | -51.9        | -74.8        | -76.3        | -99.8         |
| Russia                           | 6.0         | -64.3        | -84.2        | -90.1        | -90.3        | -99.3         |
| Rwanda                           | -6.5        | -28.0        | -38.0        | -52.8        | -54.2        | -80.4         |
| Saint Kitts and Nevis            | -1.4        | -7.0         | -5.4         | -6.1         | -5.7         | -15.0         |
| Saint Lucia                      | -4.0        | -9.9         | -11.0        | -9.4         | -9.7         | -14.8         |
| Saint Vincent and the Grenadines | -8.4        | -15.0        | -16.0        | -14.5        | -13.9        | -17.3         |
| Samoa                            | -4.4        | -2.1         | -1.5         | 0.7          | -0.9         | -8.1          |

| <b>Nation</b>             | <b>5 Tg</b> | <b>16 Tg</b> | <b>27 Tg</b> | <b>37 Tg</b> | <b>47 Tg</b> | <b>150 Tg</b> |
|---------------------------|-------------|--------------|--------------|--------------|--------------|---------------|
| Sao Tome and Principe     | -0.5        | 2.7          | 0.5          | 1.8          | 1.7          | -1.7          |
| Saudi Arabia              | 6.0         | 31.0         | 19.9         | -1.9         | 39.8         | -45.5         |
| Senegal                   | -7.5        | -15.1        | 14.8         | 9.0          | 6.8          | -28.4         |
| Serbia                    | -21.5       | -60.1        | -70.3        | -83.8        | -86.6        | -100.0        |
| Sierra Leone              | -12.0       | -8.3         | -11.5        | -4.6         | 13.0         | -77.0         |
| Slovakia                  | -10.4       | -37.9        | -42.0        | -78.4        | -78.4        | -100.0        |
| Slovenia                  | -22.3       | -53.2        | -63.0        | -83.4        | -81.4        | -99.9         |
| Solomon Islands           | -6.0        | -5.9         | -8.9         | -10.7        | -10.4        | -14.4         |
| South Africa              | -4.6        | -21.8        | -31.2        | -40.9        | -50.1        | -86.2         |
| South Korea               | -6.1        | -48.5        | -58.6        | -83.6        | -91.7        | -95.7         |
| Spain                     | 3.4         | 24.4         | 7.9          | 19.1         | 10.6         | -96.2         |
| Sri Lanka                 | -15.0       | -4.0         | -4.9         | 0.5          | -11.0        | -19.4         |
| Sudan                     | 21.9        | 27.2         | 24.4         | 35.8         | 36.8         | -42.8         |
| Suriname                  | 32.2        | 200.3        | 170.1        | 165.4        | 161.0        | 43.7          |
| Sweden                    | -36.6       | -79.0        | -97.7        | -98.5        | -98.6        | -99.2         |
| Switzerland               | -18.4       | -34.2        | -40.1        | -79.2        | -75.5        | -99.9         |
| Taiwan, province of China | -13.2       | -36.7        | -43.3        | -61.6        | -68.8        | -86.4         |
| Tajikistan                | -15.0       | -45.2        | -52.6        | -62.0        | -76.8        | -100.0        |
| Tanzania                  | 2.2         | -37.6        | -42.6        | -46.6        | -53.7        | -82.1         |
| Thailand                  | -19.6       | -26.9        | -29.3        | -38.0        | -53.9        | -97.9         |
| Togo                      | 6.6         | -8.3         | -4.5         | -8.8         | 1.6          | -60.9         |
| Trinidad and Tobago       | -2.3        | -7.0         | -7.3         | -7.9         | -7.7         | -10.3         |
| Tunisia                   | 1.7         | 13.6         | 35.3         | 97.5         | 113.0        | -64.4         |
| Turkey                    | 4.7         | 22.1         | 7.4          | 5.9          | 10.5         | -99.0         |
| Turkmenistan              | -19.5       | -31.3        | -36.6        | -40.2        | -41.1        | -99.9         |
| Uganda                    | -11.5       | -28.7        | -41.5        | -60.5        | -72.0        | -94.6         |
| Ukraine                   | 17.2        | -23.2        | -25.8        | -69.1        | -68.7        | -100.0        |
| United Arab Emirates      | 3.3         | 87.4         | 341.8        | -1.4         | -15.0        | -36.7         |
| United Kingdom            | 1.0         | -33.8        | -45.3        | -64.7        | -82.0        | -99.6         |
| United States             | -13.8       | -50.6        | -67.0        | -81.2        | -90.2        | -99.7         |
| Uruguay                   | -4.2        | -8.7         | -3.0         | -18.6        | -35.4        | -62.1         |
| Uzbekistan                | -16.7       | -19.5        | -28.4        | -29.5        | -34.8        | -100.0        |
| Vanuatu                   | -1.7        | 0.7          | -2.9         | -7.7         | -7.3         | -13.6         |
| Venezuela                 | -3.5        | 15.5         | 3.3          | 4.4          | -4.3         | -72.1         |
| Vietnam                   | -8.1        | -34.7        | -48.8        | -54.2        | -65.4        | -96.0         |
| Yemen                     | 20.3        | 69.2         | 52.3         | 51.7         | 45.1         | -57.7         |
| Zambia                    | 6.7         | 0.2          | -18.1        | -28.0        | -42.2        | -69.8         |
| Zimbabwe                  | 9.2         | -4.9         | -9.2         | -19.0        | -37.2        | -69.2         |
| <b>Total</b>              | <b>-7.0</b> | <b>-22.8</b> | <b>-32.3</b> | <b>-41.1</b> | <b>-48.1</b> | <b>-81.6</b>  |



**Table S3.** Assumptions for the *Livestock*, *Partial Livestock*, and *No Livestock* cases. Livestock includes meat, dairy, eggs, and aquaculture. Inland fish capture, a minor source of food, is not considered in any of the cases

| Assumptions                             | Livestock         | Partial Livestock                   | No Livestock                        |
|-----------------------------------------|-------------------|-------------------------------------|-------------------------------------|
| Reduction in cereals                    | ✓                 | ✓                                   | ✓                                   |
| Reduction in vegetables, fruit and nuts | ✓                 | ✓                                   | ✓                                   |
| Reduction in marine wild catch          | ✓                 | ✓                                   | ✓                                   |
| Final product of biofuel                | ✓                 | ✓                                   | ✓                                   |
| Marine fishery effort                   | Business as usual | Five times the effort <sup>12</sup> | Five times the effort <sup>12</sup> |
| Livestock, aquaculture                  | No change         | Portion of livestock remains        | Consumed in Year 1                  |
| Livestock feed from crops               | For animal feed   | Portion for human consumption       | Portion for human consumption       |

**Table S4.** Number of people who would die from starvation (millions) after the simulated nuclear war in Year 2 for all nations assuming no trade under the *Livestock* case (livestock production is continued). The second column is the population in millions in 2010<sup>45</sup>. 150 Tg + hw is half of the household waste added to food consumption, and 150 Tg + tw is total household waste added to food consumption. Bold is used for headings and global averages, and italic is used for population in 2010.

| <b>Nation</b>            | <i>Population</i> | <b>5 Tg</b> | <b>16 Tg</b> | <b>27 Tg</b> | <b>37 Tg</b> | <b>47 Tg</b> | <b>150 Tg</b> | <b>150 Tg +hw</b> | <b>150 Tg + tw</b> |
|--------------------------|-------------------|-------------|--------------|--------------|--------------|--------------|---------------|-------------------|--------------------|
| Afghanistan              | <i>28.4</i>       | 4.5         | 6.2          | 8.1          | 9.1          | 10.5         | 28.4          | 28.4              | 28.4               |
| Albania                  | <i>3.2</i>        | 0.7         | 0.0          | 0.5          | 1.1          | 1.0          | 2.8           | 2.7               | 2.7                |
| Algeria                  | <i>37.1</i>       | 19.6        | 11.6         | 16.4         | 0.0          | 0.0          | 30.4          | 29.3              | 28.2               |
| Angola                   | <i>19.5</i>       | 0.0         | 1.2          | 3.4          | 4.3          | 7.0          | 13.1          | 12.6              | 12.1               |
| Antigua and Barbuda      | <i>0.1</i>        | 0.1         | 0.1          | 0.1          | 0.1          | 0.1          | 0.1           | 0.1               | 0.1                |
| Argentina                | <i>40.4</i>       | 0.0         | 0.0          | 0.0          | 0.0          | 0.0          | 1.2           | 0.0               | 0.0                |
| Armenia                  | <i>3.0</i>        | 0.7         | 0.8          | 1.1          | 1.3          | 1.9          | 3.0           | 3.0               | 3.0                |
| Australia                | <i>22.4</i>       | 0.0         | 0.0          | 0.0          | 0.0          | 0.0          | 0.0           | 0.0               | 0.0                |
| Austria                  | <i>8.4</i>        | 0.0         | 2.9          | 3.9          | 6.4          | 6.5          | 8.4           | 8.4               | 8.4                |
| Azerbaijan               | <i>9.1</i>        | 1.7         | 2.8          | 3.4          | 3.7          | 4.4          | 9.1           | 9.1               | 9.1                |
| Bahamas                  | <i>0.4</i>        | 0.2         | 0.2          | 0.2          | 0.2          | 0.2          | 0.2           | 0.2               | 0.2                |
| Bangladesh               | <i>151.1</i>      | 0.0         | 0.0          | 0.0          | 0.0          | 0.0          | 145.4         | 144.9             | 144.4              |
| Barbados                 | <i>0.3</i>        | 0.1         | 0.1          | 0.1          | 0.1          | 0.1          | 0.1           | 0.1               | 0.1                |
| Belarus                  | <i>9.5</i>        | 0.0         | 0.0          | 3.0          | 8.4          | 9.3          | 9.5           | 9.5               | 9.5                |
| Belgium                  | <i>10.9</i>       | 2.2         | 3.1          | 3.8          | 6.8          | 6.2          | 10.9          | 10.9              | 10.9               |
| Belize                   | <i>0.3</i>        | 0.0         | 0.0          | 0.0          | 0.0          | 0.0          | 0.2           | 0.2               | 0.2                |
| Benin                    | <i>9.5</i>        | 0.0         | 1.1          | 0.2          | 0.8          | 0.1          | 5.8           | 5.5               | 5.1                |
| Bermuda                  | <i>0.1</i>        | 0.1         | 0.1          | 0.1          | 0.1          | 0.1          | 0.1           | 0.1               | 0.1                |
| Bolivia                  | <i>10.2</i>       | 0.0         | 0.0          | 0.0          | 0.7          | 1.2          | 5.7           | 5.7               | 5.7                |
| Bosnia and Herzegovina   | <i>3.8</i>        | 1.7         | 1.4          | 2.5          | 3.0          | 3.2          | 3.8           | 3.8               | 3.7                |
| Botswana                 | <i>2.0</i>        | 1.3         | 1.4          | 1.4          | 1.5          | 1.5          | 1.8           | 1.8               | 1.8                |
| Brazil                   | <i>195.2</i>      | 0.0         | 0.0          | 0.0          | 0.0          | 0.0          | 77.2          | 57.5              | 37.7               |
| Brunei                   | <i>0.4</i>        | 0.3         | 0.3          | 0.3          | 0.3          | 0.3          | 0.3           | 0.3               | 0.3                |
| Bulgaria                 | <i>7.4</i>        | 0.0         | 0.0          | 0.0          | 0.0          | 0.0          | 7.4           | 7.4               | 7.4                |
| Burkina Faso             | <i>15.5</i>       | 0.0         | 0.0          | 0.0          | 0.0          | 0.0          | 10.1          | 9.3               | 8.5                |
| Cambodia                 | <i>14.4</i>       | 1.9         | 1.9          | 0.5          | 2.8          | 6.5          | 13.3          | 13.2              | 13.2               |
| Cameroon                 | <i>20.6</i>       | 0.0         | 0.2          | 1.9          | 1.2          | 2.4          | 16.8          | 16.4              | 16.0               |
| Canada                   | <i>34.1</i>       | 0.0         | 18.5         | 30.2         | 33.3         | 33.5         | 34.0          | 33.9              | 33.9               |
| Cape Verde               | <i>0.5</i>        | 0.3         | 0.3          | 0.3          | 0.3          | 0.3          | 0.4           | 0.3               | 0.3                |
| Central African Republic | <i>4.4</i>        | 0.0         | 0.1          | 0.8          | 0.7          | 1.0          | 3.4           | 3.4               | 3.3                |
| Chad                     | <i>11.7</i>       | 0.0         | 0.0          | 0.0          | 0.0          | 0.0          | 8.1           | 8.1               | 8.1                |
| Chile                    | <i>17.2</i>       | 0.0         | 3.4          | 0.0          | 0.0          | 3.1          | 11.2          | 10.6              | 10.0               |
| China                    | <i>1367.4</i>     | 66.3        | 570.7        | 823.1        | 1029.1       | 1117.4       | 1360.5        | 1359.4            | 1358.4             |
| Colombia                 | <i>46.4</i>       | 1.6         | 3.7          | 8.3          | 12.1         | 14.4         | 37.1          | 36.5              | 35.9               |
| Republic of Congo        | <i>4.1</i>        | 0.8         | 0.7          | 1.4          | 1.3          | 1.6          | 3.1           | 3.1               | 3.1                |
| Costa Rica               | <i>4.7</i>        | 0.2         | 0.0          | 0.0          | 0.0          | 0.0          | 0.0           | 0.0               | 0.0                |
| Croatia                  | <i>4.3</i>        | 0.0         | 0.4          | 1.5          | 2.7          | 2.7          | 4.2           | 4.2               | 4.2                |

| <b>Nation</b>      | <b>Population</b> | <b>5 Tg</b> | <b>16 Tg</b> | <b>27 Tg</b> | <b>37 Tg</b> | <b>47 Tg</b> | <b>150 Tg</b> | <b>150 Tg<br/>+hw</b> | <b>150 Tg<br/>+ tw</b> |
|--------------------|-------------------|-------------|--------------|--------------|--------------|--------------|---------------|-----------------------|------------------------|
| Cuba               | 11.3              | 0.2         | 0.0          | 0.0          | 0.0          | 1.2          | 8.2           | 7.8                   | 7.3                    |
| Cyprus             | 1.1               | 0.5         | 0.5          | 0.4          | 0.4          | 0.2          | 0.8           | 0.8                   | 0.8                    |
| Czech Republic     | 10.6              | 0.0         | 0.0          | 0.7          | 8.9          | 8.5          | 10.5          | 10.5                  | 10.5                   |
| Denmark            | 5.6               | 0.0         | 0.0          | 2.8          | 4.5          | 4.6          | 5.1           | 5.1                   | 5.0                    |
| Dominican Republic | 10.0              | 0.3         | 0.0          | 0.0          | 0.0          | 0.0          | 2.4           | 2.1                   | 1.8                    |
| Ecuador            | 15.0              | 0.0         | 0.0          | 0.0          | 0.0          | 0.0          | 7.7           | 7.4                   | 7.1                    |
| Egypt              | 78.1              | 8.3         | 9.5          | 22.3         | 27.2         | 32.2         | 68.0          | 65.4                  | 62.9                   |
| El Salvador        | 6.2               | 0.0         | 0.0          | 0.0          | 0.0          | 0.0          | 4.6           | 4.6                   | 4.5                    |
| Estonia            | 1.3               | 0.0         | 0.7          | 1.2          | 1.3          | 1.2          | 1.2           | 1.2                   | 1.2                    |
| Ethiopia           | 87.1              | 0.0         | 0.0          | 12.8         | 18.8         | 37.5         | 75.2          | 75.1                  | 75.0                   |
| Finland            | 5.4               | 1.8         | 5.2          | 5.3          | 5.3          | 5.3          | 5.3           | 5.3                   | 5.3                    |
| France             | 63.2              | 0.0         | 0.0          | 0.0          | 0.0          | 0.0          | 61.5          | 61.1                  | 60.8                   |
| French Polynesia   | 0.3               | 0.1         | 0.1          | 0.1          | 0.1          | 0.1          | 0.1           | 0.1                   | 0.1                    |
| Gabon              | 1.6               | 0.5         | 0.4          | 0.6          | 0.6          | 0.7          | 1.2           | 1.1                   | 1.1                    |
| Gambia             | 1.7               | 0.5         | 1.1          | 0.8          | 0.2          | 0.8          | 0.0           | 0.0                   | 0.0                    |
| Georgia            | 4.4               | 2.5         | 2.8          | 3.3          | 3.6          | 3.7          | 4.4           | 4.4                   | 4.4                    |
| Germany            | 83.0              | 0.0         | 2.1          | 9.8          | 61.2         | 64.6         | 82.8          | 82.8                  | 82.7                   |
| Ghana              | 24.3              | 0.0         | 1.1          | 0.1          | 1.3          | 0.0          | 16.2          | 14.7                  | 13.1                   |
| Greece             | 11.1              | 0.3         | 0.0          | 0.0          | 0.0          | 0.0          | 10.5          | 10.4                  | 10.3                   |
| Grenada            | 0.1               | 0.1         | 0.1          | 0.1          | 0.1          | 0.1          | 0.1           | 0.1                   | 0.1                    |
| Guatemala          | 14.3              | 0.0         | 0.0          | 0.0          | 0.0          | 0.0          | 10.6          | 10.3                  | 10.0                   |
| Guinea             | 10.9              | 0.2         | 0.0          | 0.0          | 0.0          | 0.0          | 8.7           | 8.5                   | 8.2                    |
| Guinea-Bissau      | 1.6               | 0.0         | 0.0          | 0.0          | 0.0          | 0.0          | 0.2           | 0.1                   | 0.0                    |
| Guyana             | 0.8               | 0.0         | 0.0          | 0.0          | 0.0          | 0.0          | 0.0           | 0.0                   | 0.0                    |
| Haiti              | 9.9               | 0.0         | 0.0          | 0.0          | 0.0          | 0.0          | 0.0           | 0.0                   | 0.0                    |
| Honduras           | 7.6               | 0.0         | 0.0          | 0.0          | 0.0          | 0.0          | 5.0           | 4.8                   | 4.6                    |
| Hungary            | 10.0              | 0.0         | 1.3          | 2.9          | 6.1          | 7.0          | 10.0          | 10.0                  | 10.0                   |
| Iceland            | 0.3               | 0.0         | 0.0          | 0.0          | 0.0          | 0.0          | 0.0           | 0.0                   | 0.0                    |
| India              | 1205.6            | 0.0         | 0.0          | 0.0          | 0.0          | 118.8        | 745.9         | 707.9                 | 670.0                  |
| Indonesia          | 240.7             | 0.0         | 0.0          | 0.0          | 0.0          | 17.9         | 133.8         | 121.1                 | 108.4                  |
| Iran               | 74.5              | 11.0        | 14.6         | 27.4         | 31.5         | 33.1         | 73.2          | 73.0                  | 72.8                   |
| Iraq               | 31.0              | 13.4        | 12.9         | 15.2         | 18.2         | 17.8         | 30.9          | 30.9                  | 30.8                   |
| Ireland            | 4.5               | 0.0         | 0.1          | 0.5          | 0.6          | 1.7          | 3.0           | 2.7                   | 2.4                    |
| Israel             | 7.4               | 3.4         | 4.4          | 4.3          | 4.4          | 4.1          | 6.3           | 6.0                   | 5.7                    |
| Italy              | 60.5              | 9.6         | 13.4         | 20.5         | 31.3         | 31.0         | 58.2          | 57.7                  | 57.3                   |
| Jamaica            | 2.7               | 0.0         | 0.0          | 0.0          | 0.0          | 0.0          | 0.8           | 0.6                   | 0.5                    |
| Japan              | 127.4             | 76.9        | 99.7         | 108.1        | 115.2        | 118.6        | 124.5         | 124.3                 | 124.0                  |
| Jordan             | 6.5               | 4.1         | 4.5          | 4.5          | 4.7          | 4.7          | 6.3           | 6.3                   | 6.3                    |
| Kazakhstan         | 15.9              | 0.0         | 0.3          | 4.6          | 8.6          | 11.9         | 15.9          | 15.9                  | 15.9                   |
| Kenya              | 40.9              | 1.8         | 7.8          | 9.4          | 13.5         | 17.0         | 33.5          | 33.4                  | 33.3                   |
| Kuwait             | 3.0               | 2.6         | 2.6          | 2.6          | 2.7          | 2.7          | 3.0           | 3.0                   | 3.0                    |
| Kyrgyzstan         | 5.3               | 0.1         | 1.2          | 2.3          | 3.2          | 4.0          | 5.3           | 5.3                   | 5.3                    |
| Laos               | 6.4               | 0.2         | 2.2          | 2.7          | 3.0          | 3.8          | 6.3           | 6.3                   | 6.3                    |
| Latvia             | 2.1               | 0.0         | 0.0          | 1.7          | 2.0          | 1.9          | 2.0           | 2.0                   | 2.0                    |

| <b>Nation</b>         | <b>Population</b> | <b>5 Tg</b> | <b>16 Tg</b> | <b>27 Tg</b> | <b>37 Tg</b> | <b>47 Tg</b> | <b>150 Tg</b> | <b>150 Tg<br/>+hw</b> | <b>150 Tg<br/>+ tw</b> |
|-----------------------|-------------------|-------------|--------------|--------------|--------------|--------------|---------------|-----------------------|------------------------|
| Lebanon               | 4.3               | 2.3         | 2.5          | 2.5          | 2.3          | 2.0          | 3.8           | 3.7                   | 3.6                    |
| Lesotho               | 2.0               | 1.1         | 1.4          | 1.5          | 1.5          | 1.6          | 1.9           | 1.9                   | 1.9                    |
| Liberia               | 4.0               | 1.0         | 0.6          | 0.6          | 1.0          | 0.7          | 3.3           | 3.3                   | 3.3                    |
| Lithuania             | 3.1               | 0.0         | 0.0          | 1.5          | 3.0          | 2.9          | 3.0           | 3.0                   | 3.0                    |
| Luxembourg            | 0.5               | 0.0         | 0.0          | 0.0          | 0.2          | 0.2          | 0.5           | 0.5                   | 0.5                    |
| Madagascar            | 21.1              | 0.0         | 0.0          | 0.2          | 0.0          | 3.3          | 11.6          | 11.4                  | 11.2                   |
| Malawi                | 15.0              | 0.0         | 0.0          | 0.0          | 0.7          | 4.1          | 9.3           | 8.8                   | 8.3                    |
| Malaysia              | 28.3              | 0.0         | 0.0          | 0.0          | 0.0          | 0.0          | 14.2          | 12.0                  | 9.8                    |
| Maldives              | 0.3               | 0.2         | 0.2          | 0.2          | 0.2          | 0.2          | 0.2           | 0.2                   | 0.2                    |
| Mali                  | 14.0              | 0.0         | 0.4          | 0.3          | 0.0          | 0.4          | 9.8           | 9.0                   | 8.2                    |
| Malta                 | 0.4               | 0.3         | 0.3          | 0.3          | 0.3          | 0.3          | 0.3           | 0.3                   | 0.3                    |
| Mauritania            | 3.6               | 2.3         | 2.5          | 2.2          | 2.0          | 2.2          | 2.7           | 2.6                   | 2.4                    |
| Mexico                | 117.9             | 14.1        | 33.6         | 46.6         | 54.1         | 67.5         | 106.7         | 105.1                 | 103.5                  |
| Moldova               | 3.6               | 0.0         | 0.3          | 1.3          | 2.5          | 2.6          | 3.6           | 3.6                   | 3.6                    |
| Mongolia              | 2.7               | 0.9         | 1.6          | 2.2          | 2.4          | 2.6          | 2.7           | 2.7                   | 2.7                    |
| Montenegro            | 0.6               | 0.4         | 0.4          | 0.5          | 0.5          | 0.5          | 0.6           | 0.6                   | 0.6                    |
| Morocco               | 31.6              | 6.9         | 0.0          | 2.3          | 0.0          | 0.0          | 26.7          | 25.7                  | 24.8                   |
| Mozambique            | 24.0              | 0.0         | 0.0          | 0.0          | 0.0          | 1.2          | 10.5          | 9.8                   | 9.1                    |
| Myanmar               | 51.9              | 0.0         | 5.6          | 17.5         | 26.2         | 35.4         | 50.1          | 50.0                  | 49.9                   |
| Namibia               | 2.2               | 0.4         | 1.0          | 0.8          | 0.9          | 0.7          | 1.5           | 1.5                   | 1.5                    |
| Nepal                 | 26.8              | 1.8         | 7.7          | 9.4          | 12.5         | 16.4         | 26.2          | 26.2                  | 26.1                   |
| Netherlands           | 16.6              | 0.0         | 4.0          | 6.5          | 11.7         | 11.2         | 16.3          | 16.3                  | 16.2                   |
| New Caledonia         | 0.2               | 0.2         | 0.2          | 0.2          | 0.2          | 0.2          | 0.2           | 0.2                   | 0.2                    |
| New Zealand           | 4.4               | 0.0         | 0.0          | 0.0          | 0.0          | 0.0          | 0.0           | 0.0                   | 0.0                    |
| Nicaragua             | 5.8               | 0.0         | 0.0          | 0.0          | 0.0          | 0.0          | 3.5           | 3.4                   | 3.3                    |
| Niger                 | 15.9              | 0.0         | 0.0          | 0.0          | 0.0          | 0.0          | 12.4          | 11.9                  | 11.4                   |
| Nigeria               | 159.7             | 0.0         | 8.1          | 0.0          | 8.3          | 0.0          | 107.6         | 98.8                  | 90.0                   |
| North Korea           | 24.5              | 6.7         | 22.1         | 22.5         | 24.1         | 24.3         | 24.5          | 24.5                  | 24.5                   |
| Norway                | 4.9               | 2.7         | 4.4          | 4.6          | 4.6          | 4.7          | 4.7           | 4.7                   | 4.6                    |
| Oman                  | 2.8               | 1.8         | 0.6          | 1.4          | 0.2          | 1.1          | 0.0           | 0.0                   | 0.0                    |
| Pakistan              | 173.1             | 0.0         | 0.0          | 0.0          | 0.0          | 12.1         | 143.6         | 141.1                 | 138.7                  |
| Panama                | 3.7               | 0.9         | 0.0          | 0.0          | 0.0          | 0.0          | 0.0           | 0.0                   | 0.0                    |
| Paraguay              | 6.5               | 0.0         | 0.0          | 0.0          | 0.0          | 0.0          | 1.6           | 1.3                   | 0.9                    |
| Peru                  | 29.3              | 0.7         | 4.8          | 7.1          | 8.1          | 9.4          | 19.0          | 18.2                  | 17.4                   |
| Philippines           | 93.4              | 0.0         | 10.5         | 0.0          | 0.0          | 0.0          | 43.5          | 37.0                  | 30.5                   |
| Poland                | 38.2              | 0.0         | 0.0          | 0.7          | 34.2         | 34.0         | 38.1          | 38.1                  | 38.1                   |
| Portugal              | 10.6              | 2.3         | 3.2          | 5.4          | 6.1          | 7.1          | 9.2           | 8.9                   | 8.6                    |
| Romania               | 21.9              | 0.0         | 2.2          | 6.1          | 13.9         | 14.8         | 21.8          | 21.8                  | 21.8                   |
| Russia                | 143.6             | 0.0         | 81.1         | 115.6        | 126.4        | 128.5        | 142.0         | 141.8                 | 141.5                  |
| Rwanda                | 10.8              | 0.0         | 0.3          | 1.7          | 3.9          | 4.2          | 8.0           | 7.9                   | 7.8                    |
| Saint Kitts and Nevis | 0.1               | 0.1         | 0.1          | 0.1          | 0.1          | 0.1          | 0.1           | 0.1                   | 0.1                    |
| Saint Lucia           | 0.2               | 0.1         | 0.1          | 0.1          | 0.1          | 0.1          | 0.1           | 0.1                   | 0.1                    |
| Saudi Arabia          | 27.3              | 19.2        | 18.1         | 18.8         | 20.0         | 17.9         | 23.2          | 22.5                  | 21.9                   |
| Senegal               | 13.0              | 2.3         | 3.1          | 0.0          | 0.0          | 0.3          | 4.5           | 3.9                   | 3.3                    |

| <b>Nation</b>                | <b>Population</b> | <b>5 Tg</b>  | <b>16 Tg</b>  | <b>27 Tg</b>  | <b>37 Tg</b>  | <b>47 Tg</b>  | <b>150 Tg</b> | <b>150 Tg<br/>+hw</b> | <b>150 Tg<br/>+ tw</b> |
|------------------------------|-------------------|--------------|---------------|---------------|---------------|---------------|---------------|-----------------------|------------------------|
| Serbia                       | 9.6               | 0.0          | 2.9           | 4.8           | 6.7           | 7.2           | 9.5           | 9.5                   | 9.5                    |
| Sierra Leone                 | 5.8               | 0.0          | 0.0           | 0.0           | 0.0           | 0.0           | 4.3           | 4.2                   | 4.1                    |
| Slovakia                     | 5.4               | 0.0          | 1.4           | 1.8           | 3.9           | 4.1           | 5.4           | 5.4                   | 5.4                    |
| Slovenia                     | 2.1               | 0.5          | 0.9           | 1.2           | 1.5           | 1.5           | 2.0           | 2.0                   | 2.0                    |
| Solomon Islands              | 0.5               | 0.0          | 0.0           | 0.0           | 0.0           | 0.0           | 0.0           | 0.0                   | 0.0                    |
| South Africa                 | 51.5              | 0.0          | 6.0           | 11.1          | 16.5          | 21.7          | 41.9          | 40.4                  | 38.9                   |
| South Korea                  | 48.5              | 27.5         | 37.2          | 39.4          | 44.9          | 47.6          | 48.1          | 48.1                  | 48.0                   |
| Spain                        | 46.2              | 0.0          | 0.0           | 0.0           | 0.0           | 0.0           | 42.1          | 41.6                  | 41.1                   |
| Sri Lanka                    | 20.8              | 3.1          | 0.8           | 1.0           | 0.0           | 2.3           | 4.1           | 2.8                   | 1.6                    |
| Suriname                     | 0.5               | 0.0          | 0.0           | 0.0           | 0.0           | 0.0           | 0.0           | 0.0                   | 0.0                    |
| Sweden                       | 9.4               | 2.4          | 7.2           | 9.1           | 9.2           | 9.3           | 9.3           | 9.3                   | 9.3                    |
| Switzerland                  | 7.8               | 2.8          | 3.5           | 4.2           | 5.8           | 5.7           | 7.7           | 7.7                   | 7.7                    |
| Taiwan, province of<br>China | 23.1              | 15.7         | 18.0          | 18.6          | 20.4          | 21.1          | 22.6          | 22.6                  | 22.5                   |
| Tajikistan                   | 7.6               | 2.5          | 4.0           | 4.6           | 5.2           | 6.2           | 7.6           | 7.6                   | 7.6                    |
| Tanzania                     | 45.0              | 0.0          | 7.9           | 10.6          | 13.0          | 17.2          | 33.2          | 33.1                  | 33.0                   |
| Thailand                     | 66.4              | 0.0          | 0.0           | 0.0           | 2.0           | 18.8          | 64.5          | 64.3                  | 64.1                   |
| Togo                         | 6.3               | 0.0          | 0.4           | 0.1           | 0.4           | 0.0           | 3.8           | 3.7                   | 3.5                    |
| Trinidad and Tobago          | 1.3               | 1.1          | 1.1           | 1.1           | 1.1           | 1.1           | 1.1           | 1.1                   | 1.1                    |
| Tunisia                      | 10.6              | 4.0          | 3.2           | 2.6           | 0.0           | 0.0           | 8.0           | 7.5                   | 7.0                    |
| Turkey                       | 72.1              | 0.0          | 0.0           | 0.0           | 0.0           | 0.0           | 70.3          | 69.9                  | 69.5                   |
| Turkmenistan                 | 5.0               | 1.0          | 2.1           | 2.5           | 2.7           | 2.7           | 5.0           | 5.0                   | 5.0                    |
| Uganda                       | 34.0              | 0.0          | 6.3           | 11.4          | 18.6          | 23.8          | 32.9          | 32.8                  | 32.7                   |
| Ukraine                      | 46.1              | 0.0          | 0.0           | 0.0           | 24.3          | 24.7          | 46.0          | 46.0                  | 46.0                   |
| United Arab Emirates         | 8.4               | 7.6          | 6.0           | 0.7           | 7.9           | 8.1           | 8.2           | 8.2                   | 8.2                    |
| United Kingdom               | 62.3              | 3.7          | 21.6          | 27.8          | 37.4          | 46.2          | 55.9          | 54.8                  | 53.8                   |
| United States                | 312.2             | 0.0          | 30.7          | 115.2         | 186.0         | 240.9         | 305.9         | 304.6                 | 303.3                  |
| Uruguay                      | 3.4               | 0.0          | 0.0           | 0.0           | 0.0           | 0.0           | 0.0           | 0.0                   | 0.0                    |
| Uzbekistan                   | 27.8              | 1.9          | 4.4           | 7.1           | 7.7           | 9.4           | 27.8          | 27.8                  | 27.8                   |
| Venezuela                    | 29.0              | 10.4         | 7.4           | 9.7           | 9.6           | 11.3          | 23.4          | 22.8                  | 22.1                   |
| Vietnam                      | 89.0              | 0.0          | 21.9          | 36.7          | 42.4          | 54.2          | 86.1          | 85.7                  | 85.4                   |
| Yemen                        | 22.8              | 12.9         | 9.0           | 10.3          | 10.4          | 11.0          | 19.3          | 19.2                  | 19.1                   |
| Zambia                       | 13.2              | 0.0          | 0.0           | 0.0           | 0.0           | 1.7           | 7.1           | 7.1                   | 7.1                    |
| Zimbabwe                     | 13.1              | 0.7          | 2.3           | 2.8           | 3.8           | 5.8           | 9.3           | 9.3                   | 9.3                    |
| <b>Total</b>                 | <b>6700.1</b>     | <b>409.2</b> | <b>1249.3</b> | <b>1798.4</b> | <b>2363.8</b> | <b>2812.0</b> | <b>5441.9</b> | <b>5318.2</b>         | <b>5195.7</b>          |



| <b>Nation</b>      | <i>Population</i> | <b>5 Tg</b> | <b>16 Tg</b> | <b>27 Tg</b> | <b>37 Tg</b> | <b>47 Tg</b> | <b>150 Tg</b> | <b>150 Tg +<br/>hw</b> | <b>150 Tg<br/>+ tw</b> |
|--------------------|-------------------|-------------|--------------|--------------|--------------|--------------|---------------|------------------------|------------------------|
| Croatia            | 4.3               | 0.0         | 0.0          | 0.0          | 1.6          | 1.6          | 4.3           | 4.3                    | 4.3                    |
| Cuba               | 11.3              | 0.0         | 0.0          | 0.0          | 0.0          | 0.0          | 7.7           | 7.2                    | 6.7                    |
| Cyprus             | 1.1               | 0.4         | 0.4          | 0.3          | 0.2          | 0.0          | 0.8           | 0.8                    | 0.8                    |
| Czech Republic     | 10.6              | 0.0         | 0.0          | 0.0          | 8.7          | 7.6          | 10.5          | 10.5                   | 10.5                   |
| Denmark            | 5.6               | 0.0         | 0.0          | 0.7          | 4.7          | 4.8          | 5.1           | 5.1                    | 5.0                    |
| Dominican Republic | 10.0              | 0.0         | 0.0          | 0.0          | 0.0          | 0.0          | 2.0           | 1.7                    | 1.4                    |
| Ecuador            | 15.0              | 0.0         | 0.0          | 0.0          | 0.0          | 0.0          | 7.9           | 7.6                    | 7.3                    |
| Egypt              | 78.1              | 0.4         | 2.3          | 9.0          | 15.0         | 21.3         | 65.8          | 62.7                   | 59.6                   |
| El Salvador        | 6.2               | 0.0         | 0.0          | 0.0          | 0.0          | 0.0          | 4.5           | 4.5                    | 4.4                    |
| Estonia            | 1.3               | 0.0         | 0.6          | 1.2          | 1.3          | 1.2          | 1.3           | 1.3                    | 1.3                    |
| Ethiopia           | 87.1              | 0.0         | 0.0          | 10.7         | 17.0         | 36.8         | 75.7          | 75.6                   | 75.5                   |
| Finland            | 5.4               | 0.5         | 5.3          | 5.3          | 5.3          | 5.3          | 5.3           | 5.3                    | 5.3                    |
| France             | 63.2              | 0.0         | 0.0          | 0.0          | 0.0          | 0.0          | 62.2          | 62.0                   | 61.8                   |
| French Polynesia   | 0.3               | 0.0         | 0.0          | 0.0          | 0.0          | 0.0          | 0.1           | 0.0                    | 0.0                    |
| Gabon              | 1.6               | 0.3         | 0.3          | 0.5          | 0.5          | 0.5          | 1.1           | 1.1                    | 1.0                    |
| Gambia             | 1.7               | 0.4         | 1.1          | 0.7          | 0.2          | 0.7          | 0.0           | 0.0                    | 0.0                    |
| Georgia            | 4.4               | 2.6         | 3.0          | 3.5          | 3.7          | 3.8          | 4.4           | 4.4                    | 4.4                    |
| Germany            | 83.0              | 0.0         | 0.0          | 0.0          | 57.0         | 60.2         | 82.8          | 82.8                   | 82.8                   |
| Ghana              | 24.3              | 0.0         | 0.0          | 0.0          | 0.0          | 0.0          | 15.2          | 13.4                   | 11.7                   |
| Greece             | 11.1              | 0.0         | 0.0          | 0.0          | 0.0          | 0.0          | 10.4          | 10.3                   | 10.2                   |
| Grenada            | 0.1               | 0.1         | 0.1          | 0.1          | 0.1          | 0.1          | 0.1           | 0.1                    | 0.1                    |
| Guatemala          | 14.3              | 0.0         | 0.0          | 0.0          | 0.0          | 0.0          | 10.2          | 9.9                    | 9.5                    |
| Guinea             | 10.9              | 0.0         | 0.0          | 0.0          | 0.0          | 0.0          | 8.5           | 8.2                    | 8.0                    |
| Guinea-Bissau      | 1.6               | 0.0         | 0.0          | 0.0          | 0.0          | 0.0          | 0.1           | 0.0                    | 0.0                    |
| Guyana             | 0.8               | 0.0         | 0.0          | 0.0          | 0.0          | 0.0          | 0.0           | 0.0                    | 0.0                    |
| Haiti              | 9.9               | 0.0         | 0.0          | 0.0          | 0.0          | 0.0          | 0.0           | 0.0                    | 0.0                    |
| Honduras           | 7.6               | 0.0         | 0.0          | 0.0          | 0.0          | 0.0          | 4.9           | 4.7                    | 4.4                    |
| Hungary            | 10.0              | 0.0         | 0.0          | 0.0          | 2.7          | 3.7          | 10.0          | 10.0                   | 10.0                   |
| Iceland            | 0.3               | 0.0         | 0.0          | 0.0          | 0.0          | 0.0          | 0.0           | 0.0                    | 0.0                    |
| India              | 1205.6            | 0.0         | 0.0          | 0.0          | 0.0          | 65.7         | 720.5         | 680.5                  | 640.4                  |
| Indonesia          | 240.7             | 0.0         | 0.0          | 0.0          | 0.0          | 0.0          | 122.7         | 108.6                  | 94.6                   |
| Iran               | 74.5              | 0.0         | 0.3          | 14.2         | 18.4         | 21.2         | 72.9          | 72.7                   | 72.5                   |
| Iraq               | 31.0              | 11.1        | 10.7         | 13.1         | 16.5         | 16.1         | 30.9          | 30.9                   | 30.8                   |
| Ireland            | 4.5               | 0.0         | 0.0          | 0.0          | 0.4          | 1.9          | 3.7           | 3.6                    | 3.4                    |
| Israel             | 7.4               | 3.7         | 4.2          | 4.3          | 4.4          | 4.5          | 6.6           | 6.5                    | 6.3                    |
| Italy              | 60.5              | 0.0         | 0.0          | 8.2          | 23.9         | 22.8         | 58.6          | 58.3                   | 57.9                   |
| Jamaica            | 2.7               | 0.0         | 0.0          | 0.0          | 0.0          | 0.0          | 0.7           | 0.6                    | 0.4                    |
| Japan              | 127.4             | 71.5        | 98.2         | 108.5        | 116.5        | 120.0        | 125.2         | 125.0                  | 124.8                  |
| Jordan             | 6.5               | 4.0         | 4.3          | 4.3          | 4.5          | 4.8          | 6.4           | 6.4                    | 6.3                    |
| Kazakhstan         | 15.9              | 0.0         | 0.0          | 1.4          | 7.3          | 12.0         | 15.9          | 15.9                   | 15.9                   |
| Kenya              | 40.9              | 2.9         | 9.0          | 10.7         | 14.6         | 17.9         | 34.4          | 34.2                   | 34.1                   |
| Kuwait             | 3.0               | 2.6         | 2.7          | 2.7          | 2.7          | 2.7          | 3.0           | 3.0                    | 3.0                    |
| Kyrgyzstan         | 5.3               | 0.0         | 0.4          | 1.9          | 3.1          | 4.2          | 5.3           | 5.3                    | 5.3                    |
| Laos               | 6.4               | 0.0         | 1.4          | 2.0          | 2.3          | 3.2          | 6.4           | 6.3                    | 6.3                    |

| <b>Nation</b>         | <i>Population</i> | <b>5 Tg</b> | <b>16 Tg</b> | <b>27 Tg</b> | <b>37 Tg</b> | <b>47 Tg</b> | <b>150 Tg</b> | <b>150 Tg +<br/>hw</b> | <b>150 Tg<br/>+ tw</b> |
|-----------------------|-------------------|-------------|--------------|--------------|--------------|--------------|---------------|------------------------|------------------------|
| Latvia                | 2.1               | 0.0         | 0.0          | 1.7          | 2.0          | 2.0          | 2.0           | 2.0                    | 2.0                    |
| Lebanon               | 4.3               | 2.0         | 2.3          | 2.3          | 2.0          | 1.8          | 3.7           | 3.7                    | 3.6                    |
| Lesotho               | 2.0               | 1.1         | 1.4          | 1.5          | 1.5          | 1.7          | 1.9           | 1.9                    | 1.9                    |
| Liberia               | 4.0               | 0.9         | 0.6          | 0.6          | 1.0          | 0.7          | 3.3           | 3.3                    | 3.3                    |
| Lithuania             | 3.1               | 0.0         | 0.0          | 0.6          | 3.0          | 3.0          | 3.0           | 3.0                    | 3.0                    |
| Luxembourg            | 0.5               | 0.0         | 0.0          | 0.0          | 0.2          | 0.2          | 0.5           | 0.5                    | 0.5                    |
| Madagascar            | 21.1              | 0.0         | 0.0          | 0.0          | 0.0          | 2.0          | 11.1          | 10.9                   | 10.7                   |
| Malawi                | 15.0              | 0.0         | 0.0          | 0.0          | 0.0          | 1.5          | 8.0           | 7.4                    | 6.8                    |
| Malaysia              | 28.3              | 0.0         | 0.0          | 0.0          | 0.0          | 0.0          | 10.4          | 7.6                    | 4.8                    |
| Maldives              | 0.3               | 0.2         | 0.2          | 0.2          | 0.2          | 0.2          | 0.2           | 0.2                    | 0.2                    |
| Mali                  | 14.0              | 0.0         | 0.0          | 0.0          | 0.0          | 0.0          | 9.9           | 9.2                    | 8.5                    |
| Malta                 | 0.4               | 0.3         | 0.3          | 0.3          | 0.3          | 0.3          | 0.3           | 0.3                    | 0.3                    |
| Mauritania            | 3.6               | 2.5         | 2.7          | 2.3          | 2.2          | 2.3          | 2.9           | 2.8                    | 2.6                    |
| Mexico                | 117.9             | 0.0         | 9.1          | 26.8         | 36.8         | 54.7         | 107.1         | 105.6                  | 104.1                  |
| Moldova               | 3.6               | 0.0         | 0.0          | 0.0          | 1.8          | 1.9          | 3.6           | 3.6                    | 3.6                    |
| Mongolia              | 2.7               | 1.1         | 1.9          | 2.5          | 2.6          | 2.7          | 2.7           | 2.7                    | 2.7                    |
| Montenegro            | 0.6               | 0.4         | 0.4          | 0.5          | 0.5          | 0.5          | 0.6           | 0.6                    | 0.6                    |
| Morocco               | 31.6              | 2.9         | 0.0          | 0.0          | 0.0          | 0.0          | 26.2          | 25.2                   | 24.2                   |
| Mozambique            | 24.0              | 0.0         | 0.0          | 0.0          | 0.0          | 0.0          | 9.4           | 8.6                    | 7.8                    |
| Myanmar               | 51.9              | 0.0         | 0.0          | 0.3          | 13.6         | 28.1         | 50.5          | 50.4                   | 50.3                   |
| Namibia               | 2.2               | 0.5         | 1.1          | 0.9          | 1.0          | 0.8          | 1.5           | 1.5                    | 1.5                    |
| Nepal                 | 26.8              | 0.3         | 6.6          | 8.5          | 11.6         | 16.0         | 26.2          | 26.1                   | 26.0                   |
| Netherlands           | 16.6              | 0.0         | 3.2          | 4.4          | 9.6          | 11.7         | 16.4          | 16.4                   | 16.4                   |
| New Caledonia         | 0.2               | 0.2         | 0.2          | 0.2          | 0.2          | 0.2          | 0.2           | 0.1                    | 0.1                    |
| New Zealand           | 4.4               | 0.0         | 0.0          | 0.0          | 0.0          | 0.0          | 1.1           | 0.7                    | 0.4                    |
| Nicaragua             | 5.8               | 0.0         | 0.0          | 0.0          | 0.0          | 0.0          | 3.7           | 3.6                    | 3.4                    |
| Niger                 | 15.9              | 0.0         | 0.0          | 0.0          | 0.0          | 0.0          | 12.1          | 11.5                   | 11.0                   |
| Nigeria               | 159.7             | 0.0         | 0.0          | 0.0          | 0.0          | 0.0          | 97.7          | 87.2                   | 76.8                   |
| North Korea           | 24.5              | 5.7         | 22.1         | 22.5         | 24.3         | 24.4         | 24.5          | 24.5                   | 24.5                   |
| Norway                | 4.9               | 3.1         | 4.5          | 4.7          | 4.7          | 4.7          | 4.8           | 4.7                    | 4.7                    |
| Oman                  | 2.8               | 1.9         | 0.7          | 1.5          | 0.2          | 1.2          | 0.0           | 0.0                    | 0.0                    |
| Pakistan              | 173.1             | 0.0         | 0.0          | 0.0          | 0.0          | 4.2          | 140.1         | 137.4                  | 134.6                  |
| Panama                | 3.7               | 0.4         | 0.0          | 0.0          | 0.0          | 0.0          | 0.0           | 0.0                    | 0.0                    |
| Paraguay              | 6.5               | 0.0         | 0.0          | 0.0          | 0.0          | 0.0          | 0.0           | 0.0                    | 0.0                    |
| Peru                  | 29.3              | 0.0         | 1.0          | 3.8          | 5.0          | 6.7          | 18.1          | 17.3                   | 16.4                   |
| Philippines           | 93.4              | 0.0         | 0.9          | 0.0          | 0.0          | 0.0          | 37.8          | 30.5                   | 23.3                   |
| Poland                | 38.2              | 0.0         | 0.0          | 0.0          | 32.9         | 31.8         | 38.1          | 38.1                   | 38.1                   |
| Portugal              | 10.6              | 1.7         | 2.8          | 5.1          | 6.1          | 7.2          | 9.8           | 9.6                    | 9.5                    |
| Romania               | 21.9              | 0.0         | 0.0          | 0.0          | 9.5          | 10.4         | 21.8          | 21.7                   | 21.7                   |
| Russia                | 143.6             | 0.0         | 70.8         | 111.4        | 123.7        | 124.9        | 141.9         | 141.7                  | 141.5                  |
| Rwanda                | 10.8              | 0.0         | 0.3          | 1.8          | 3.9          | 4.2          | 8.0           | 7.9                    | 7.9                    |
| Saint Kitts and Nevis | 0.1               | 0.1         | 0.1          | 0.1          | 0.1          | 0.1          | 0.1           | 0.1                    | 0.1                    |
| Saint Lucia           | 0.2               | 0.1         | 0.1          | 0.1          | 0.1          | 0.1          | 0.1           | 0.1                    | 0.1                    |
| Saudi Arabia          | 27.3              | 18.1        | 16.3         | 17.2         | 18.9         | 15.7         | 22.6          | 21.8                   | 21.1                   |



| <b>Nation</b>             | <b>Population</b> | <b>5 Tg</b>  | <b>16 Tg</b> | <b>27 Tg</b>  | <b>37 Tg</b>  | <b>47 Tg</b>  | <b>150 Tg</b> | <b>150 Tg +<br/>hw</b> | <b>150 Tg<br/>+ tw</b> |
|---------------------------|-------------------|--------------|--------------|---------------|---------------|---------------|---------------|------------------------|------------------------|
| Senegal                   | 13.0              | 1.8          | 2.7          | 0.0           | 0.0           | 0.0           | 4.2           | 3.5                    | 2.8                    |
| Serbia                    | 9.6               | 0.0          | 0.0          | 0.2           | 4.3           | 5.3           | 9.6           | 9.6                    | 9.6                    |
| Sierra Leone              | 5.8               | 0.0          | 0.0          | 0.0           | 0.0           | 0.0           | 4.1           | 4.0                    | 4.0                    |
| Slovakia                  | 5.4               | 0.0          | 0.0          | 0.1           | 3.4           | 3.5           | 5.4           | 5.4                    | 5.4                    |
| Slovenia                  | 2.1               | 0.4          | 1.0          | 1.2           | 1.6           | 1.6           | 2.0           | 2.0                    | 2.0                    |
| Solomon Islands           | 0.5               | 0.0          | 0.0          | 0.0           | 0.0           | 0.0           | 0.0           | 0.0                    | 0.0                    |
| South Africa              | 51.5              | 0.0          | 0.0          | 4.6           | 11.1          | 17.3          | 41.4          | 39.8                   | 38.2                   |
| South Korea               | 48.5              | 24.9         | 36.1         | 38.7          | 45.2          | 47.7          | 48.2          | 48.1                   | 48.1                   |
| Spain                     | 46.2              | 0.0          | 0.0          | 0.0           | 0.0           | 0.0           | 42.2          | 41.7                   | 41.2                   |
| Sri Lanka                 | 20.8              | 2.5          | 0.1          | 0.3           | 0.0           | 1.6           | 3.5           | 2.2                    | 0.9                    |
| Suriname                  | 0.5               | 0.0          | 0.0          | 0.0           | 0.0           | 0.0           | 0.0           | 0.0                    | 0.0                    |
| Sweden                    | 9.4               | 0.2          | 6.5          | 9.1           | 9.3           | 9.3           | 9.3           | 9.3                    | 9.3                    |
| Switzerland               | 7.8               | 3.1          | 3.9          | 4.4           | 6.3           | 6.1           | 7.8           | 7.8                    | 7.8                    |
| Taiwan, province of China | 23.1              | 15.1         | 17.7         | 18.4          | 20.3          | 21.1          | 22.8          | 22.8                   | 22.7                   |
| Tajikistan                | 7.6               | 0.9          | 3.1          | 3.8           | 4.5           | 5.8           | 7.6           | 7.6                    | 7.6                    |
| Tanzania                  | 45.0              | 0.0          | 6.2          | 9.2           | 11.7          | 16.1          | 33.4          | 33.3                   | 33.2                   |
| Thailand                  | 66.4              | 0.0          | 0.0          | 0.0           | 0.0           | 4.2           | 64.5          | 64.4                   | 64.2                   |
| Togo                      | 6.3               | 0.0          | 0.0          | 0.0           | 0.0           | 0.0           | 3.7           | 3.5                    | 3.4                    |
| Trinidad and Tobago       | 1.3               | 1.1          | 1.1          | 1.1           | 1.1           | 1.1           | 1.1           | 1.1                    | 1.1                    |
| Tunisia                   | 10.6              | 2.6          | 1.7          | 0.4           | 0.0           | 0.0           | 7.7           | 7.1                    | 6.6                    |
| Turkey                    | 72.1              | 0.0          | 0.0          | 0.0           | 0.0           | 0.0           | 70.7          | 70.3                   | 70.0                   |
| Turkmenistan              | 5.0               | 0.0          | 0.3          | 0.8           | 1.1           | 1.1           | 5.0           | 5.0                    | 5.0                    |
| Uganda                    | 34.0              | 0.0          | 6.1          | 11.3          | 18.9          | 23.9          | 33.0          | 33.0                   | 32.9                   |
| Ukraine                   | 46.1              | 0.0          | 0.0          | 0.0           | 7.0           | 6.9           | 46.0          | 46.0                   | 46.0                   |
| United Arab Emirates      | 8.4               | 7.6          | 5.8          | 0.0           | 8.0           | 8.2           | 8.3           | 8.3                    | 8.3                    |
| United Kingdom            | 62.3              | 0.0          | 11.7         | 20.0          | 33.8          | 46.2          | 59.1          | 58.5                   | 58.0                   |
| United States             | 312.2             | 0.0          | 0.0          | 0.0           | 106.7         | 202.7         | 307.4         | 306.4                  | 305.4                  |
| Uruguay                   | 3.4               | 0.0          | 0.0          | 0.0           | 0.0           | 0.0           | 0.0           | 0.0                    | 0.0                    |
| Uzbekistan                | 27.8              | 0.0          | 0.0          | 1.9           | 2.4           | 4.4           | 27.8          | 27.8                   | 27.8                   |
| Venezuela                 | 29.0              | 8.6          | 4.9          | 7.4           | 7.2           | 9.1           | 23.1          | 22.4                   | 21.7                   |
| Vietnam                   | 89.0              | 0.0          | 12.1         | 29.3          | 35.8          | 49.4          | 86.2          | 85.8                   | 85.5                   |
| Yemen                     | 22.8              | 12.9         | 8.8          | 10.2          | 10.2          | 10.8          | 19.4          | 19.3                   | 19.1                   |
| Zambia                    | 13.2              | 0.0          | 0.0          | 0.0           | 0.0           | 1.1           | 6.9           | 6.9                    | 6.9                    |
| Zimbabwe                  | 13.1              | 0.3          | 2.0          | 2.5           | 3.6           | 5.7           | 9.4           | 9.3                    | 9.3                    |
| <b>Total</b>              | <b>6700.1</b>     | <b>254.7</b> | <b>925.6</b> | <b>1426.1</b> | <b>2080.9</b> | <b>2512.2</b> | <b>5340.8</b> | <b>5205.1</b>          | <b>5081.2</b>          |

**Table S6.** Number of people who would die from starvation (millions) after the simulated nuclear war in Year 2 for all nations, assuming no trade, under the *No Livestock* case (assuming livestock is killed in Year 1 and 50% of livestock grain feed is used for human consumption). The second column is the population in millions in 2010<sup>42</sup>. 150 Tg + hw is half of the household waste added to food consumption, and 150 Tg + tw is total household waste added to food consumption. Bold is used for headings and global averages, and italic is used for population in 2010.

| <b>Nation</b>            | <i>Population</i> | <b>5 Tg</b> | <b>16 Tg</b> | <b>27 Tg</b> | <b>37 Tg</b> | <b>47 Tg</b> | <b>150 Tg</b> | <b>150 Tg + hw</b> | <b>150 Tg + tw</b> |
|--------------------------|-------------------|-------------|--------------|--------------|--------------|--------------|---------------|--------------------|--------------------|
| Afghanistan              | <i>28.4</i>       | 5.9         | 7.3          | 8.6          | 9.2          | 10.2         | 28.4          | 28.4               | 28.4               |
| Albania                  | <i>3.2</i>        | 1.1         | 0.3          | 0.6          | 1.3          | 1.1          | 3.1           | 3.1                | 3.1                |
| Algeria                  | <i>37.1</i>       | 19.1        | 10.3         | 14.8         | 0.0          | 0.0          | 29.7          | 28.5               | 27.3               |
| Angola                   | <i>19.5</i>       | 0.0         | 0.0          | 0.1          | 1.1          | 4.5          | 11.9          | 11.3               | 10.7               |
| Antigua and Barbuda      | <i>0.1</i>        | 0.1         | 0.1          | 0.1          | 0.1          | 0.1          | 0.1           | 0.1                | 0.1                |
| Argentina                | <i>40.4</i>       | 0.0         | 0.0          | 0.0          | 0.0          | 0.0          | 0.0           | 0.0                | 0.0                |
| Armenia                  | <i>3.0</i>        | 1.0         | 1.1          | 1.2          | 1.3          | 1.8          | 3.0           | 3.0                | 3.0                |
| Australia                | <i>22.4</i>       | 0.0         | 0.0          | 0.0          | 0.0          | 0.0          | 0.0           | 0.0                | 0.0                |
| Austria                  | <i>8.4</i>        | 0.0         | 3.1          | 4.0          | 7.4          | 7.2          | 8.4           | 8.4                | 8.4                |
| Azerbaijan               | <i>9.1</i>        | 1.3         | 2.5          | 2.6          | 3.0          | 3.8          | 9.1           | 9.1                | 9.1                |
| Bahamas                  | <i>0.4</i>        | 0.2         | 0.2          | 0.2          | 0.2          | 0.2          | 0.2           | 0.2                | 0.2                |
| Bangladesh               | <i>151.1</i>      | 0.0         | 0.0          | 0.0          | 0.0          | 0.0          | 146.3         | 145.8              | 145.4              |
| Barbados                 | <i>0.3</i>        | 0.1         | 0.1          | 0.1          | 0.1          | 0.1          | 0.1           | 0.1                | 0.1                |
| Belarus                  | <i>9.5</i>        | 0.0         | 0.0          | 0.0          | 8.5          | 9.4          | 9.5           | 9.5                | 9.5                |
| Belgium                  | <i>10.9</i>       | 1.9         | 3.8          | 4.0          | 5.7          | 7.4          | 10.9          | 10.9               | 10.9               |
| Belize                   | <i>0.3</i>        | 0.0         | 0.0          | 0.0          | 0.0          | 0.0          | 0.1           | 0.1                | 0.1                |
| Benin                    | <i>9.5</i>        | 0.0         | 0.0          | 0.0          | 0.0          | 0.0          | 5.3           | 4.9                | 4.4                |
| Bermuda                  | <i>0.1</i>        | 0.1         | 0.1          | 0.1          | 0.1          | 0.1          | 0.1           | 0.1                | 0.1                |
| Bolivia                  | <i>10.2</i>       | 0.0         | 0.0          | 0.0          | 0.2          | 0.8          | 5.8           | 5.8                | 5.8                |
| Bosnia and Herzegovina   | <i>3.8</i>        | 1.6         | 1.3          | 2.6          | 3.2          | 3.2          | 3.8           | 3.8                | 3.8                |
| Botswana                 | <i>2.0</i>        | 1.5         | 1.6          | 1.6          | 1.6          | 1.7          | 1.8           | 1.8                | 1.8                |
| Brazil                   | <i>195.2</i>      | 0.0         | 0.0          | 0.0          | 0.0          | 0.0          | 54.0          | 30.2               | 6.5                |
| Brunei                   | <i>0.4</i>        | 0.4         | 0.4          | 0.4          | 0.4          | 0.4          | 0.4           | 0.4                | 0.4                |
| Bulgaria                 | <i>7.4</i>        | 0.0         | 0.0          | 0.0          | 0.0          | 0.0          | 7.4           | 7.4                | 7.4                |
| Burkina Faso             | <i>15.5</i>       | 0.0         | 0.0          | 0.0          | 0.0          | 0.0          | 10.1          | 9.3                | 8.5                |
| Cambodia                 | <i>14.4</i>       | 1.0         | 0.9          | 0.0          | 1.9          | 5.9          | 13.4          | 13.3               | 13.2               |
| Cameroon                 | <i>20.6</i>       | 0.0         | 0.0          | 0.3          | 0.0          | 0.8          | 16.6          | 16.2               | 15.8               |
| Canada                   | <i>34.1</i>       | 0.0         | 7.5          | 29.2         | 33.6         | 33.7         | 34.0          | 34.0               | 33.9               |
| Cape Verde               | <i>0.5</i>        | 0.3         | 0.4          | 0.4          | 0.4          | 0.4          | 0.4           | 0.3                | 0.3                |
| Central African Republic | <i>4.4</i>        | 0.2         | 0.4          | 1.2          | 1.1          | 1.3          | 3.6           | 3.6                | 3.6                |
| Chad                     | <i>11.7</i>       | 0.0         | 0.0          | 0.0          | 0.0          | 0.0          | 8.0           | 8.0                | 8.0                |
| Chile                    | <i>17.2</i>       | 0.0         | 3.7          | 0.0          | 0.0          | 2.9          | 12.0          | 11.5               | 11.0               |
| China                    | <i>1367.4</i>     | 25.2        | 558.4        | 821.9        | 1031.9       | 1117.3       | 1362.3        | 1361.6             | 1360.8             |
| Colombia                 | <i>46.4</i>       | 1.6         | 2.9          | 7.8          | 12.0         | 14.5         | 40.0          | 39.5               | 39.1               |
| Republic of Congo        | <i>4.1</i>        | 0.8         | 0.7          | 1.4          | 1.3          | 1.6          | 3.1           | 3.1                | 3.1                |
| Costa Rica               | <i>4.7</i>        | 0.0         | 0.0          | 0.0          | 0.0          | 0.0          | 0.0           | 0.0                | 0.0                |
| Croatia                  | <i>4.3</i>        | 0.0         | 0.0          | 0.0          | 1.9          | 1.9          | 4.3           | 4.3                | 4.3                |

| <b>Nation</b>      | <b>Population</b> | <b>5 Tg</b> | <b>16 Tg</b> | <b>27 Tg</b> | <b>37 Tg</b> | <b>47 Tg</b> | <b>150 Tg</b> | <b>150 Tg<br/>+ hw</b> | <b>150 Tg<br/>+ tw</b> |
|--------------------|-------------------|-------------|--------------|--------------|--------------|--------------|---------------|------------------------|------------------------|
| Cuba               | 11.3              | 0.0         | 0.0          | 0.0          | 0.0          | 0.0          | 8.0           | 7.5                    | 7.0                    |
| Cyprus             | 1.1               | 0.6         | 0.6          | 0.5          | 0.4          | 0.2          | 0.9           | 0.9                    | 0.9                    |
| Czech Republic     | 10.6              | 0.0         | 0.0          | 0.0          | 9.2          | 7.9          | 10.5          | 10.5                   | 10.5                   |
| Denmark            | 5.6               | 0.0         | 0.0          | 1.2          | 4.9          | 4.9          | 5.2           | 5.1                    | 5.0                    |
| Dominican Republic | 10.0              | 0.0         | 0.0          | 0.0          | 0.0          | 0.0          | 3.5           | 3.2                    | 2.9                    |
| Ecuador            | 15.0              | 0.0         | 0.0          | 0.0          | 0.0          | 0.0          | 9.4           | 9.1                    | 8.9                    |
| Egypt              | 78.1              | 8.0         | 10.1         | 10.6         | 16.3         | 22.6         | 66.2          | 63.2                   | 60.2                   |
| El Salvador        | 6.2               | 0.0         | 0.0          | 0.0          | 0.0          | 0.0          | 4.8           | 4.7                    | 4.6                    |
| Estonia            | 1.3               | 0.0         | 0.7          | 1.3          | 1.3          | 1.3          | 1.3           | 1.3                    | 1.3                    |
| Ethiopia           | 87.1              | 0.0         | 0.0          | 13.4         | 19.7         | 39.2         | 76.9          | 76.8                   | 76.7                   |
| Finland            | 5.4               | 1.3         | 5.3          | 5.3          | 5.3          | 5.3          | 5.3           | 5.3                    | 5.3                    |
| France             | 63.2              | 0.0         | 0.0          | 0.0          | 0.0          | 0.0          | 63.0          | 62.9                   | 62.9                   |
| French Polynesia   | 0.3               | 0.1         | 0.1          | 0.1          | 0.1          | 0.1          | 0.1           | 0.0                    | 0.0                    |
| Gabon              | 1.6               | 0.3         | 0.3          | 0.5          | 0.5          | 0.6          | 1.1           | 1.1                    | 1.0                    |
| Gambia             | 1.7               | 0.4         | 1.1          | 0.7          | 0.2          | 0.7          | 0.0           | 0.0                    | 0.0                    |
| Georgia            | 4.4               | 3.0         | 3.3          | 3.7          | 3.9          | 4.0          | 4.4           | 4.4                    | 4.4                    |
| Germany            | 83.0              | 0.0         | 0.0          | 0.0          | 61.7         | 63.9         | 82.9          | 82.9                   | 82.8                   |
| Ghana              | 24.3              | 0.0         | 0.0          | 0.0          | 0.0          | 0.0          | 15.3          | 13.5                   | 11.8                   |
| Greece             | 11.1              | 0.0         | 0.0          | 0.0          | 0.0          | 0.0          | 10.6          | 10.5                   | 10.4                   |
| Grenada            | 0.1               | 0.1         | 0.1          | 0.1          | 0.1          | 0.1          | 0.1           | 0.1                    | 0.1                    |
| Guatemala          | 14.3              | 0.0         | 0.0          | 0.0          | 0.0          | 0.0          | 10.5          | 10.2                   | 9.9                    |
| Guinea             | 10.9              | 0.0         | 0.0          | 0.0          | 0.0          | 0.0          | 8.6           | 8.3                    | 8.1                    |
| Guinea-Bissau      | 1.6               | 0.0         | 0.0          | 0.0          | 0.0          | 0.0          | 0.2           | 0.1                    | 0.0                    |
| Guyana             | 0.8               | 0.0         | 0.0          | 0.0          | 0.0          | 0.0          | 0.0           | 0.0                    | 0.0                    |
| Haiti              | 9.9               | 0.0         | 0.0          | 0.0          | 0.0          | 0.0          | 0.0           | 0.0                    | 0.0                    |
| Honduras           | 7.6               | 0.0         | 0.0          | 0.0          | 0.0          | 0.0          | 5.2           | 5.1                    | 4.9                    |
| Hungary            | 10.0              | 0.0         | 0.0          | 0.0          | 3.4          | 4.0          | 10.0          | 10.0                   | 10.0                   |
| Iceland            | 0.3               | 0.0         | 0.0          | 0.0          | 0.0          | 0.0          | 0.0           | 0.0                    | 0.0                    |
| India              | 1205.6            | 0.0         | 0.0          | 0.0          | 0.0          | 97.1         | 731.1         | 691.9                  | 652.8                  |
| Indonesia          | 240.7             | 0.0         | 0.0          | 0.0          | 0.0          | 0.0          | 124.6         | 110.8                  | 97.0                   |
| Iran               | 74.5              | 0.0         | 5.2          | 17.0         | 20.4         | 23.5         | 73.0          | 72.8                   | 72.6                   |
| Iraq               | 31.0              | 11.5        | 11.0         | 13.4         | 16.6         | 16.3         | 30.9          | 30.9                   | 30.9                   |
| Ireland            | 4.5               | 0.0         | 0.6          | 1.0          | 1.7          | 2.9          | 4.4           | 4.4                    | 4.4                    |
| Israel             | 7.4               | 5.0         | 5.1          | 5.2          | 5.3          | 5.6          | 7.1           | 7.1                    | 7.0                    |
| Italy              | 60.5              | 0.2         | 5.3          | 13.3         | 28.4         | 26.9         | 59.4          | 59.2                   | 59.0                   |
| Jamaica            | 2.7               | 0.0         | 0.0          | 0.0          | 0.0          | 0.0          | 1.0           | 0.9                    | 0.7                    |
| Japan              | 127.4             | 79.2        | 102.8        | 112.2        | 119.1        | 121.9        | 125.6         | 125.5                  | 125.3                  |
| Jordan             | 6.5               | 4.5         | 4.5          | 4.6          | 4.7          | 5.1          | 6.4           | 6.4                    | 6.4                    |
| Kazakhstan         | 15.9              | 0.0         | 0.0          | 3.0          | 8.7          | 13.1         | 15.9          | 15.9                   | 15.9                   |
| Kenya              | 40.9              | 5.7         | 11.6         | 13.4         | 16.8         | 19.9         | 35.5          | 35.4                   | 35.3                   |
| Kuwait             | 3.0               | 2.8         | 2.8          | 2.8          | 2.8          | 2.8          | 3.0           | 3.0                    | 3.0                    |
| Kyrgyzstan         | 5.3               | 0.0         | 1.0          | 2.5          | 3.5          | 4.6          | 5.3           | 5.3                    | 5.3                    |
| Laos               | 6.4               | 0.0         | 1.5          | 2.1          | 2.4          | 3.3          | 6.4           | 6.4                    | 6.4                    |
| Latvia             | 2.1               | 0.0         | 0.0          | 1.8          | 2.0          | 2.0          | 2.0           | 2.0                    | 2.0                    |

| <b>Nation</b>         | <b>Population</b> | <b>5 Tg</b> | <b>16 Tg</b> | <b>27 Tg</b> | <b>37 Tg</b> | <b>47 Tg</b> | <b>150 Tg</b> | <b>150 Tg<br/>+ hw</b> | <b>150 Tg<br/>+ tw</b> |
|-----------------------|-------------------|-------------|--------------|--------------|--------------|--------------|---------------|------------------------|------------------------|
| Lebanon               | 4.3               | 2.3         | 2.5          | 2.5          | 2.3          | 2.1          | 3.9           | 3.8                    | 3.7                    |
| Lesotho               | 2.0               | 1.2         | 1.5          | 1.5          | 1.6          | 1.7          | 1.9           | 1.9                    | 1.9                    |
| Liberia               | 4.0               | 1.0         | 0.6          | 0.6          | 1.0          | 0.7          | 3.3           | 3.3                    | 3.3                    |
| Lithuania             | 3.1               | 0.0         | 0.0          | 0.8          | 3.0          | 3.0          | 3.0           | 3.0                    | 3.0                    |
| Luxembourg            | 0.5               | 0.1         | 0.1          | 0.1          | 0.2          | 0.3          | 0.5           | 0.5                    | 0.5                    |
| Madagascar            | 21.1              | 0.0         | 0.0          | 0.0          | 0.0          | 2.7          | 11.6          | 11.4                   | 11.2                   |
| Malawi                | 15.0              | 0.0         | 0.0          | 0.0          | 0.0          | 1.7          | 8.1           | 7.5                    | 6.9                    |
| Malaysia              | 28.3              | 0.0         | 0.0          | 0.0          | 0.0          | 0.0          | 11.0          | 8.3                    | 5.6                    |
| Maldives              | 0.3               | 0.2         | 0.2          | 0.2          | 0.2          | 0.2          | 0.2           | 0.2                    | 0.2                    |
| Mali                  | 14.0              | 0.0         | 0.4          | 0.0          | 0.0          | 0.2          | 10.5          | 9.9                    | 9.3                    |
| Malta                 | 0.4               | 0.3         | 0.3          | 0.3          | 0.3          | 0.3          | 0.3           | 0.3                    | 0.3                    |
| Mauritania            | 3.6               | 2.7         | 2.8          | 2.5          | 2.4          | 2.5          | 3.1           | 3.0                    | 2.9                    |
| Mexico                | 117.9             | 0.0         | 18.3         | 34.9         | 44.2         | 61.0         | 109.9         | 108.8                  | 107.7                  |
| Moldova               | 3.6               | 0.0         | 0.0          | 0.2          | 1.9          | 2.0          | 3.6           | 3.6                    | 3.6                    |
| Mongolia              | 2.7               | 1.5         | 2.2          | 2.7          | 2.7          | 2.7          | 2.7           | 2.7                    | 2.7                    |
| Montenegro            | 0.6               | 0.4         | 0.4          | 0.5          | 0.6          | 0.6          | 0.6           | 0.6                    | 0.6                    |
| Morocco               | 31.6              | 4.3         | 0.0          | 0.0          | 0.0          | 0.0          | 26.7          | 25.8                   | 24.8                   |
| Mozambique            | 24.0              | 0.0         | 0.0          | 0.0          | 0.0          | 0.0          | 9.6           | 8.8                    | 8.0                    |
| Myanmar               | 51.9              | 0.0         | 0.0          | 2.6          | 15.4         | 29.4         | 50.8          | 50.7                   | 50.6                   |
| Namibia               | 2.2               | 0.6         | 1.1          | 1.0          | 1.1          | 0.9          | 1.5           | 1.5                    | 1.5                    |
| Nepal                 | 26.8              | 1.4         | 7.4          | 9.3          | 12.2         | 16.5         | 26.2          | 26.1                   | 26.0                   |
| Netherlands           | 16.6              | 1.7         | 7.5          | 7.5          | 10.8         | 13.7         | 16.5          | 16.5                   | 16.5                   |
| New Caledonia         | 0.2               | 0.2         | 0.2          | 0.2          | 0.2          | 0.2          | 0.2           | 0.2                    | 0.1                    |
| New Zealand           | 4.4               | 1.0         | 0.9          | 1.2          | 1.6          | 1.6          | 3.0           | 2.9                    | 2.7                    |
| Nicaragua             | 5.8               | 0.0         | 0.0          | 0.0          | 0.0          | 0.0          | 4.0           | 3.9                    | 3.8                    |
| Niger                 | 15.9              | 0.0         | 0.0          | 0.0          | 0.0          | 0.0          | 12.3          | 11.8                   | 11.3                   |
| Nigeria               | 159.7             | 0.0         | 0.0          | 0.0          | 0.0          | 0.0          | 98.4          | 88.1                   | 77.7                   |
| North Korea           | 24.5              | 6.3         | 22.2         | 22.7         | 24.4         | 24.4         | 24.5          | 24.5                   | 24.5                   |
| Norway                | 4.9               | 3.6         | 4.7          | 4.7          | 4.7          | 4.7          | 4.8           | 4.8                    | 4.8                    |
| Oman                  | 2.8               | 2.1         | 1.0          | 1.7          | 0.6          | 1.5          | 0.0           | 0.0                    | 0.0                    |
| Pakistan              | 173.1             | 0.0         | 0.0          | 0.0          | 11.1         | 14.7         | 140.4         | 137.7                  | 134.9                  |
| Panama                | 3.7               | 0.8         | 0.0          | 0.0          | 0.0          | 0.0          | 0.0           | 0.0                    | 0.0                    |
| Paraguay              | 6.5               | 0.0         | 0.0          | 0.0          | 0.0          | 0.0          | 0.0           | 0.0                    | 0.0                    |
| Peru                  | 29.3              | 0.0         | 2.4          | 5.2          | 6.2          | 7.9          | 19.0          | 18.2                   | 17.4                   |
| Philippines           | 93.4              | 0.0         | 4.7          | 0.0          | 0.0          | 0.0          | 40.1          | 33.1                   | 26.2                   |
| Poland                | 38.2              | 0.0         | 0.0          | 0.0          | 33.9         | 32.5         | 38.1          | 38.1                   | 38.1                   |
| Portugal              | 10.6              | 3.4         | 4.4          | 6.2          | 7.2          | 8.1          | 10.4          | 10.4                   | 10.4                   |
| Romania               | 21.9              | 0.0         | 0.0          | 0.0          | 10.4         | 11.0         | 21.8          | 21.7                   | 21.7                   |
| Russia                | 143.6             | 0.0         | 78.4         | 114.7        | 125.4        | 125.8        | 142.0         | 141.8                  | 141.6                  |
| Rwanda                | 10.8              | 0.0         | 0.5          | 1.9          | 4.1          | 4.3          | 8.1           | 8.0                    | 7.9                    |
| Saint Kitts and Nevis | 0.1               | 0.1         | 0.1          | 0.1          | 0.1          | 0.1          | 0.1           | 0.1                    | 0.1                    |
| Saint Lucia           | 0.2               | 0.1         | 0.1          | 0.1          | 0.1          | 0.1          | 0.1           | 0.1                    | 0.1                    |
| Saudi Arabia          | 27.3              | 20.0        | 18.2         | 19.0         | 20.5         | 17.6         | 23.5          | 22.9                   | 22.3                   |
| Senegal               | 13.0              | 2.0         | 2.8          | 0.0          | 0.0          | 0.0          | 4.3           | 3.7                    | 3.1                    |

| <b>Nation</b>             | <b>Population</b> | <b>5 Tg</b>  | <b>16 Tg</b>  | <b>27 Tg</b>  | <b>37 Tg</b>  | <b>47 Tg</b>  | <b>150 Tg</b> | <b>150 Tg<br/>+ hw</b> | <b>150 Tg<br/>+ tw</b> |
|---------------------------|-------------------|--------------|---------------|---------------|---------------|---------------|---------------|------------------------|------------------------|
| Serbia                    | 9.6               | 0.0          | 0.0           | 0.9           | 4.9           | 5.7           | 9.6           | 9.6                    | 9.6                    |
| Sierra Leone              | 5.8               | 0.0          | 0.0           | 0.0           | 0.0           | 0.0           | 4.2           | 4.1                    | 4.0                    |
| Slovakia                  | 5.4               | 0.0          | 0.3           | 0.6           | 3.6           | 3.6           | 5.4           | 5.4                    | 5.4                    |
| Slovenia                  | 2.1               | 0.7          | 1.2           | 1.4           | 1.8           | 1.7           | 2.1           | 2.1                    | 2.1                    |
| Solomon Islands           | 0.5               | 0.0          | 0.0           | 0.0           | 0.0           | 0.0           | 0.0           | 0.0                    | 0.0                    |
| South Africa              | 51.5              | 0.0          | 2.1           | 8.0           | 14.1          | 20.0          | 42.8          | 41.4                   | 40.1                   |
| South Korea               | 48.5              | 27.6         | 37.7          | 40.0          | 45.9          | 47.8          | 48.2          | 48.1                   | 48.1                   |
| Spain                     | 46.2              | 0.0          | 0.0           | 0.0           | 0.0           | 0.0           | 43.5          | 43.2                   | 42.8                   |
| Sri Lanka                 | 20.8              | 2.7          | 0.3           | 0.5           | 0.0           | 1.8           | 3.6           | 2.3                    | 1.1                    |
| Suriname                  | 0.5               | 0.0          | 0.0           | 0.0           | 0.0           | 0.0           | 0.0           | 0.0                    | 0.0                    |
| Sweden                    | 9.4               | 1.2          | 6.7           | 9.2           | 9.3           | 9.3           | 9.3           | 9.3                    | 9.3                    |
| Switzerland               | 7.8               | 4.5          | 5.2           | 5.4           | 7.0           | 6.8           | 7.8           | 7.8                    | 7.8                    |
| Taiwan, province of China | 23.1              | 16.9         | 18.9          | 19.5          | 21.0          | 21.6          | 23.0          | 23.0                   | 22.9                   |
| Tajikistan                | 7.6               | 1.3          | 3.5           | 4.1           | 4.8           | 5.9           | 7.6           | 7.6                    | 7.6                    |
| Tanzania                  | 45.0              | 0.0          | 7.4           | 10.4          | 12.9          | 17.1          | 34.3          | 34.2                   | 34.1                   |
| Thailand                  | 66.4              | 0.0          | 0.0           | 0.0           | 0.0           | 6.1           | 64.8          | 64.6                   | 64.4                   |
| Togo                      | 6.3               | 0.0          | 0.1           | 0.0           | 0.1           | 0.0           | 3.7           | 3.6                    | 3.4                    |
| Trinidad and Tobago       | 1.3               | 1.2          | 1.2           | 1.2           | 1.2           | 1.2           | 1.2           | 1.2                    | 1.1                    |
| Tunisia                   | 10.6              | 3.3          | 2.4           | 0.8           | 0.0           | 0.0           | 8.1           | 7.6                    | 7.1                    |
| Turkey                    | 72.1              | 0.0          | 0.0           | 0.0           | 0.0           | 0.0           | 71.2          | 71.0                   | 70.8                   |
| Turkmenistan              | 5.0               | 0.0          | 0.5           | 0.9           | 1.1           | 1.2           | 5.0           | 5.0                    | 5.0                    |
| Uganda                    | 34.0              | 0.3          | 7.2           | 12.2          | 19.7          | 24.3          | 33.2          | 33.2                   | 33.1                   |
| Ukraine                   | 46.1              | 0.0          | 0.0           | 0.0           | 8.5           | 8.0           | 46.0          | 46.0                   | 46.0                   |
| United Arab Emirates      | 8.4               | 7.8          | 6.1           | 0.3           | 8.1           | 8.3           | 8.4           | 8.4                    | 8.4                    |
| United Kingdom            | 62.3              | 0.0          | 18.4          | 26.0          | 39.0          | 50.5          | 62.2          | 62.2                   | 62.2                   |
| United States             | 312.2             | 0.0          | 0.0           | 0.0           | 131.1         | 217.8         | 309.6         | 309.1                  | 308.6                  |
| Uruguay                   | 3.4               | 0.0          | 0.0           | 0.0           | 0.0           | 0.0           | 0.0           | 0.0                    | 0.0                    |
| Uzbekistan                | 27.8              | 0.0          | 0.5           | 3.5           | 3.9           | 5.7           | 27.8          | 27.8                   | 27.8                   |
| Venezuela                 | 29.0              | 10.9         | 7.3           | 9.6           | 9.4           | 11.0          | 23.9          | 23.3                   | 22.7                   |
| Vietnam                   | 89.0              | 0.0          | 17.0          | 33.2          | 39.3          | 52.1          | 86.6          | 86.3                   | 86.0                   |
| Yemen                     | 22.8              | 13.5         | 9.5           | 10.9          | 10.9          | 11.4          | 19.6          | 19.5                   | 19.4                   |
| Zambia                    | 13.2              | 0.0          | 0.0           | 0.0           | 0.0           | 1.4           | 7.1           | 7.1                    | 7.1                    |
| Zimbabwe                  | 13.1              | 0.9          | 2.5           | 3.0           | 4.1           | 6.1           | 9.7           | 9.7                    | 9.6                    |
| <b>Total</b>              | <b>6700.1</b>     | <b>335.4</b> | <b>1122.4</b> | <b>1579.2</b> | <b>2238.7</b> | <b>2675.3</b> | <b>5412.9</b> | <b>5286.1</b>          | <b>5159.4</b>          |

**Table S7:** Number of people who would die from starvation (millions) after the simulated nuclear war in Year 2 for all nations assuming that trade would continue under the *Livestock* case (livestock production is continued). The second column is the population in millions in 2010<sup>45</sup>. 150 Tg + hw is half of the household waste added to food consumption, and 150 Tg + tw is total household waste added to food consumption. Bold is used for headings and global averages, and italic is used for population in 2010.

| <b>Nation</b>            | <i>Population</i> | <b>5 Tg</b> | <b>16 Tg</b> | <b>27 Tg</b> | <b>37 Tg</b> | <b>47 Tg</b> | <b>150 Tg</b> | <b>150 Tg +hw</b> | <b>150 Tg + tw</b> |
|--------------------------|-------------------|-------------|--------------|--------------|--------------|--------------|---------------|-------------------|--------------------|
| Afghanistan              | 28.4              | 0.5         | 2.5          | 4.7          | 5.8          | 7.3          | 28.4          | 28.4              | 28.4               |
| Albania                  | 3.2               | 0.0         | 0.0          | 0.0          | 0.1          | 0.0          | 2.7           | 2.7               | 2.7                |
| Algeria                  | 37.1              | 0.0         | 0.0          | 0.0          | 0.0          | 0.0          | 19.8          | 17.0              | 14.3               |
| Angola                   | 19.5              | 0.0         | 0.0          | 1.5          | 2.5          | 5.5          | 12.3          | 11.7              | 11.1               |
| Antigua and Barbuda      | 0.1               | 0.0         | 0.0          | 0.0          | 0.0          | 0.0          | 0.0           | 0.0               | 0.0                |
| Argentina                | 40.4              | 0.0         | 0.0          | 0.0          | 0.0          | 0.0          | 20.9          | 18.5              | 16.0               |
| Armenia                  | 3.0               | 0.0         | 0.0          | 0.0          | 0.0          | 1.0          | 3.0           | 3.0               | 3.0                |
| Australia                | 22.4              | 0.0         | 0.0          | 0.0          | 0.0          | 0.0          | 0.0           | 0.0               | 0.0                |
| Austria                  | 8.4               | 0.0         | 3.1          | 4.1          | 6.7          | 6.7          | 8.4           | 8.4               | 8.4                |
| Azerbaijan               | 9.1               | 0.0         | 0.0          | 0.0          | 0.6          | 1.7          | 9.1           | 9.1               | 9.1                |
| Bahamas                  | 0.4               | 0.0         | 0.0          | 0.0          | 0.0          | 0.0          | 0.0           | 0.0               | 0.0                |
| Bangladesh               | 151.1             | 0.0         | 0.0          | 0.0          | 0.0          | 0.0          | 145.2         | 144.6             | 144.1              |
| Barbados                 | 0.3               | 0.0         | 0.0          | 0.0          | 0.0          | 0.0          | 0.0           | 0.0               | 0.0                |
| Belarus                  | 9.5               | 0.0         | 0.0          | 3.1          | 8.7          | 9.4          | 9.5           | 9.5               | 9.5                |
| Belgium                  | 10.9              | 0.0         | 0.1          | 0.8          | 4.4          | 4.9          | 10.9          | 10.9              | 10.9               |
| Belize                   | 0.3               | 0.0         | 0.0          | 0.0          | 0.0          | 0.0          | 0.2           | 0.2               | 0.2                |
| Benin                    | 9.5               | 0.0         | 0.0          | 0.0          | 0.0          | 0.0          | 5.1           | 4.6               | 4.1                |
| Bermuda                  | 0.1               | 0.0         | 0.0          | 0.0          | 0.0          | 0.0          | 0.0           | 0.0               | 0.0                |
| Bolivia                  | 10.2              | 0.0         | 0.0          | 1.2          | 2.4          | 2.8          | 6.5           | 6.5               | 6.5                |
| Bosnia and Herzegovina   | 3.8               | 0.5         | 0.1          | 1.9          | 2.7          | 2.8          | 3.7           | 3.7               | 3.7                |
| Botswana                 | 2.0               | 0.0         | 0.0          | 0.0          | 0.0          | 0.3          | 1.3           | 1.3               | 1.3                |
| Brazil                   | 195.2             | 0.0         | 0.0          | 0.0          | 2.1          | 21.7         | 106.1         | 91.4              | 76.7               |
| Brunei                   | 0.4               | 0.0         | 0.0          | 0.0          | 0.0          | 0.0          | 0.0           | 0.0               | 0.0                |
| Bulgaria                 | 7.4               | 0.0         | 0.0          | 0.0          | 0.5          | 0.0          | 7.4           | 7.4               | 7.4                |
| Burkina Faso             | 15.5              | 0.0         | 0.0          | 0.0          | 0.0          | 0.0          | 10.2          | 9.4               | 8.6                |
| Cambodia                 | 14.4              | 1.5         | 1.4          | 0.0          | 2.4          | 6.2          | 13.3          | 13.2              | 13.1               |
| Cameroon                 | 20.6              | 0.0         | 0.0          | 0.3          | 0.0          | 0.8          | 16.4          | 16.0              | 15.6               |
| Canada                   | 34.1              | 2.5         | 24.0         | 31.1         | 33.3         | 33.5         | 33.9          | 33.9              | 33.9               |
| Cape Verde               | 0.5               | 0.0         | 0.0          | 0.0          | 0.0          | 0.0          | 0.0           | 0.0               | 0.0                |
| Central African Republic | 4.4               | 0.0         | 0.0          | 0.5          | 0.4          | 0.7          | 3.3           | 3.3               | 3.3                |
| Chad                     | 11.7              | 0.0         | 0.0          | 0.0          | 0.0          | 0.0          | 7.9           | 7.9               | 7.9                |
| Chile                    | 17.2              | 0.0         | 0.0          | 0.0          | 0.0          | 0.0          | 9.8           | 9.1               | 8.3                |
| China                    | 1367.4            | 0.0         | 516.1        | 785.6        | 1005.8       | 1100.2       | 1360.0        | 1358.9            | 1357.8             |
| Colombia                 | 46.4              | 0.0         | 0.0          | 0.4          | 5.1          | 7.9          | 35.8          | 35.0              | 34.3               |
| Republic of Congo        | 4.1               | 0.0         | 0.0          | 0.2          | 0.2          | 0.5          | 2.7           | 2.7               | 2.7                |
| Costa Rica               | 4.7               | 0.5         | 0.0          | 0.0          | 0.0          | 0.0          | 0.0           | 0.0               | 0.0                |
| Croatia                  | 4.3               | 0.0         | 0.0          | 1.2          | 2.5          | 2.6          | 4.2           | 4.2               | 4.2                |

| <b>Nation</b>      | <b>Population</b> | <b>5 Tg</b> | <b>16 Tg</b> | <b>27 Tg</b> | <b>37 Tg</b> | <b>47 Tg</b> | <b>150 Tg</b> | <b>150 Tg<br/>+hw</b> | <b>150 Tg<br/>+ tw</b> |
|--------------------|-------------------|-------------|--------------|--------------|--------------|--------------|---------------|-----------------------|------------------------|
| Cuba               | 11.3              | 0.0         | 0.0          | 0.0          | 0.0          | 0.0          | 6.8           | 6.2                   | 5.5                    |
| Cyprus             | 1.1               | 0.0         | 0.0          | 0.0          | 0.0          | 0.0          | 0.5           | 0.5                   | 0.5                    |
| Czech Republic     | 10.6              | 0.0         | 0.0          | 1.4          | 9.0          | 8.7          | 10.5          | 10.5                  | 10.5                   |
| Denmark            | 5.6               | 0.0         | 0.0          | 3.8          | 5.2          | 5.2          | 5.4           | 5.4                   | 5.4                    |
| Dominican Republic | 10.0              | 0.0         | 0.0          | 0.0          | 0.0          | 0.0          | 0.0           | 0.0                   | 0.0                    |
| Ecuador            | 15.0              | 0.0         | 0.0          | 0.0          | 0.0          | 0.7          | 8.4           | 8.1                   | 7.8                    |
| Egypt              | 78.1              | 0.0         | 0.0          | 0.0          | 0.0          | 3.7          | 61.8          | 57.7                  | 53.6                   |
| El Salvador        | 6.2               | 0.0         | 0.0          | 0.0          | 0.0          | 0.0          | 4.1           | 4.0                   | 3.9                    |
| Estonia            | 1.3               | 0.0         | 0.8          | 1.2          | 1.3          | 1.3          | 1.3           | 1.3                   | 1.3                    |
| Ethiopia           | 87.1              | 0.0         | 3.9          | 17.7         | 23.2         | 40.7         | 75.8          | 75.7                  | 75.7                   |
| Finland            | 5.4               | 1.5         | 5.2          | 5.3          | 5.3          | 5.3          | 5.3           | 5.3                   | 5.3                    |
| France             | 63.2              | 0.0         | 0.0          | 0.0          | 2.2          | 5.1          | 61.6          | 61.3                  | 61.0                   |
| French Polynesia   | 0.3               | 0.0         | 0.0          | 0.0          | 0.0          | 0.0          | 0.0           | 0.0                   | 0.0                    |
| Gabon              | 1.6               | 0.0         | 0.0          | 0.0          | 0.0          | 0.1          | 0.9           | 0.8                   | 0.8                    |
| Gambia             | 1.7               | 0.0         | 0.8          | 0.2          | 0.0          | 0.3          | 0.0           | 0.0                   | 0.0                    |
| Georgia            | 4.4               | 0.0         | 0.1          | 1.6          | 2.4          | 2.7          | 4.4           | 4.4                   | 4.4                    |
| Germany            | 83.0              | 0.0         | 0.1          | 6.6          | 60.8         | 64.0         | 82.5          | 82.4                  | 82.3                   |
| Ghana              | 24.3              | 0.0         | 0.0          | 0.0          | 0.0          | 0.0          | 15.1          | 13.3                  | 11.5                   |
| Greece             | 11.1              | 0.0         | 0.0          | 0.0          | 0.0          | 0.0          | 10.2          | 10.1                  | 10.0                   |
| Grenada            | 0.1               | 0.0         | 0.0          | 0.0          | 0.0          | 0.0          | 0.0           | 0.0                   | 0.0                    |
| Guatemala          | 14.3              | 0.0         | 0.0          | 0.0          | 0.0          | 0.0          | 10.7          | 10.5                  | 10.2                   |
| Guinea             | 10.9              | 0.0         | 0.0          | 0.0          | 0.0          | 0.0          | 8.5           | 8.2                   | 7.9                    |
| Guinea-Bissau      | 1.6               | 0.0         | 0.0          | 0.0          | 0.0          | 0.0          | 0.0           | 0.0                   | 0.0                    |
| Guyana             | 0.8               | 0.0         | 0.0          | 0.0          | 0.0          | 0.0          | 0.0           | 0.0                   | 0.0                    |
| Haiti              | 9.9               | 0.0         | 0.0          | 0.0          | 0.0          | 0.0          | 0.0           | 0.0                   | 0.0                    |
| Honduras           | 7.6               | 0.0         | 0.0          | 0.0          | 0.0          | 0.0          | 4.9           | 4.6                   | 4.4                    |
| Hungary            | 10.0              | 0.0         | 3.2          | 4.5          | 6.9          | 7.7          | 10.0          | 10.0                  | 10.0                   |
| Iceland            | 0.3               | 0.0         | 0.0          | 0.0          | 0.0          | 0.0          | 0.0           | 0.0                   | 0.0                    |
| India              | 1205.6            | 0.0         | 0.0          | 0.0          | 0.0          | 142.1        | 756.2         | 719.1                 | 682.0                  |
| Indonesia          | 240.7             | 0.0         | 0.0          | 0.0          | 7.8          | 35.5         | 141.6         | 129.9                 | 118.1                  |
| Iran               | 74.5              | 0.0         | 0.0          | 10.9         | 16.1         | 18.5         | 72.8          | 72.6                  | 72.3                   |
| Iraq               | 31.0              | 0.0         | 0.0          | 0.0          | 3.9          | 2.7          | 30.7          | 30.7                  | 30.7                   |
| Ireland            | 4.5               | 0.0         | 0.0          | 0.3          | 0.9          | 2.3          | 3.9           | 3.8                   | 3.7                    |
| Israel             | 7.4               | 0.0         | 0.0          | 0.0          | 0.0          | 0.0          | 5.4           | 5.0                   | 4.6                    |
| Italy              | 60.5              | 0.0         | 0.0          | 3.2          | 18.5         | 18.3         | 57.0          | 56.3                  | 55.6                   |
| Jamaica            | 2.7               | 0.0         | 0.0          | 0.0          | 0.0          | 0.0          | 0.0           | 0.0                   | 0.0                    |
| Japan              | 127.4             | 0.0         | 55.6         | 81.2         | 101.1        | 109.8        | 122.6         | 122.2                 | 121.7                  |
| Jordan             | 6.5               | 0.0         | 0.0          | 0.0          | 0.0          | 0.4          | 6.1           | 6.1                   | 6.0                    |
| Kazakhstan         | 15.9              | 0.0         | 1.5          | 5.3          | 9.0          | 12.0         | 15.9          | 15.9                  | 15.9                   |
| Kenya              | 40.9              | 0.0         | 2.4          | 4.3          | 9.1          | 13.1         | 32.5          | 32.4                  | 32.2                   |
| Kuwait             | 3.0               | 0.0         | 0.0          | 0.0          | 0.0          | 0.0          | 2.9           | 2.8                   | 2.8                    |
| Kyrgyzstan         | 5.3               | 0.0         | 0.5          | 1.8          | 2.9          | 4.0          | 5.3           | 5.3                   | 5.3                    |
| Laos               | 6.4               | 0.4         | 2.3          | 2.8          | 3.1          | 3.9          | 6.3           | 6.3                   | 6.3                    |
| Latvia             | 2.1               | 0.0         | 0.0          | 1.9          | 2.1          | 2.0          | 2.1           | 2.1                   | 2.1                    |

| <b>Nation</b>         | <b>Population</b> | <b>5 Tg</b> | <b>16 Tg</b> | <b>27 Tg</b> | <b>37 Tg</b> | <b>47 Tg</b> | <b>150 Tg</b> | <b>150 Tg<br/>+hw</b> | <b>150 Tg<br/>+ tw</b> |
|-----------------------|-------------------|-------------|--------------|--------------|--------------|--------------|---------------|-----------------------|------------------------|
| Lebanon               | 4.3               | 0.0         | 0.0          | 0.0          | 0.0          | 0.0          | 2.8           | 2.5                   | 2.3                    |
| Lesotho               | 2.0               | 0.0         | 0.4          | 0.6          | 0.7          | 1.1          | 1.7           | 1.7                   | 1.7                    |
| Liberia               | 4.0               | 0.0         | 0.0          | 0.0          | 0.0          | 0.0          | 3.0           | 2.9                   | 2.9                    |
| Lithuania             | 3.1               | 0.0         | 0.0          | 1.8          | 3.0          | 2.9          | 3.0           | 3.0                   | 3.0                    |
| Luxembourg            | 0.5               | 0.0         | 0.0          | 0.0          | 0.2          | 0.2          | 0.5           | 0.5                   | 0.5                    |
| Madagascar            | 21.1              | 0.0         | 0.0          | 0.4          | 0.0          | 3.4          | 11.7          | 11.5                  | 11.3                   |
| Malawi                | 15.0              | 0.0         | 0.0          | 0.0          | 1.6          | 4.8          | 9.6           | 9.1                   | 8.7                    |
| Malaysia              | 28.3              | 0.0         | 0.0          | 0.3          | 0.0          | 0.0          | 16.8          | 15.1                  | 13.3                   |
| Maldives              | 0.3               | 0.0         | 0.0          | 0.0          | 0.0          | 0.0          | 0.0           | 0.0                   | 0.0                    |
| Mali                  | 14.0              | 0.0         | 0.4          | 0.4          | 0.0          | 0.5          | 9.8           | 9.0                   | 8.2                    |
| Malta                 | 0.4               | 0.0         | 0.0          | 0.0          | 0.0          | 0.0          | 0.0           | 0.0                   | 0.0                    |
| Mauritania            | 3.6               | 0.5         | 1.0          | 0.0          | 0.0          | 0.0          | 1.7           | 1.3                   | 1.0                    |
| Mexico                | 117.9             | 0.0         | 6.1          | 23.6         | 33.6         | 51.5         | 103.8         | 101.8                 | 99.8                   |
| Moldova               | 3.6               | 0.0         | 0.9          | 1.7          | 2.7          | 2.8          | 3.6           | 3.6                   | 3.6                    |
| Mongolia              | 2.7               | 0.2         | 1.3          | 2.2          | 2.4          | 2.6          | 2.7           | 2.7                   | 2.7                    |
| Montenegro            | 0.6               | 0.0         | 0.0          | 0.2          | 0.3          | 0.3          | 0.6           | 0.6                   | 0.6                    |
| Morocco               | 31.6              | 0.0         | 0.0          | 0.0          | 0.0          | 0.0          | 24.9          | 23.6                  | 22.3                   |
| Mozambique            | 24.0              | 0.0         | 0.0          | 0.0          | 0.0          | 1.1          | 10.4          | 9.7                   | 9.0                    |
| Myanmar               | 51.9              | 0.0         | 7.3          | 18.9         | 27.3         | 36.2         | 50.4          | 50.2                  | 50.1                   |
| Namibia               | 2.2               | 0.0         | 0.6          | 0.3          | 0.5          | 0.1          | 1.3           | 1.3                   | 1.3                    |
| Nepal                 | 26.8              | 0.0         | 6.2          | 8.0          | 11.3         | 15.6         | 26.2          | 26.1                  | 26.0                   |
| Netherlands           | 16.6              | 0.0         | 1.0          | 2.4          | 8.4          | 10.8         | 16.4          | 16.3                  | 16.3                   |
| New Caledonia         | 0.2               | 0.0         | 0.0          | 0.0          | 0.0          | 0.0          | 0.0           | 0.0                   | 0.0                    |
| New Zealand           | 4.4               | 0.0         | 0.0          | 0.0          | 0.1          | 0.2          | 2.0           | 1.8                   | 1.5                    |
| Nicaragua             | 5.8               | 0.0         | 0.0          | 0.0          | 0.0          | 0.0          | 3.8           | 3.6                   | 3.5                    |
| Niger                 | 15.9              | 0.0         | 0.0          | 0.0          | 0.0          | 0.0          | 12.4          | 11.9                  | 11.4                   |
| Nigeria               | 159.7             | 0.0         | 0.0          | 0.0          | 0.0          | 0.0          | 98.6          | 88.2                  | 77.9                   |
| North Korea           | 24.5              | 3.1         | 21.6         | 22.1         | 24.1         | 24.3         | 24.5          | 24.5                  | 24.5                   |
| Norway                | 4.9               | 2.2         | 4.4          | 4.6          | 4.7          | 4.8          | 4.7           | 4.7                   | 4.7                    |
| Oman                  | 2.8               | 0.0         | 0.0          | 0.0          | 0.0          | 0.0          | 0.0           | 0.0                   | 0.0                    |
| Pakistan              | 173.1             | 0.0         | 0.0          | 0.0          | 0.9          | 13.2         | 143.9         | 141.5                 | 139.0                  |
| Panama                | 3.7               | 0.0         | 0.0          | 0.0          | 0.0          | 0.0          | 0.0           | 0.0                   | 0.0                    |
| Paraguay              | 6.5               | 0.0         | 0.0          | 0.0          | 0.0          | 0.9          | 4.4           | 4.2                   | 4.1                    |
| Peru                  | 29.3              | 0.0         | 0.0          | 2.8          | 4.1          | 5.9          | 18.3          | 17.4                  | 16.6                   |
| Philippines           | 93.4              | 0.0         | 7.1          | 0.0          | 0.0          | 0.0          | 41.2          | 34.4                  | 27.6                   |
| Poland                | 38.2              | 0.0         | 0.0          | 0.0          | 34.2         | 33.8         | 38.0          | 38.0                  | 38.0                   |
| Portugal              | 10.6              | 0.0         | 0.0          | 0.6          | 2.3          | 4.2          | 8.8           | 8.4                   | 8.0                    |
| Romania               | 21.9              | 0.0         | 4.0          | 7.5          | 14.7         | 15.5         | 21.8          | 21.8                  | 21.8                   |
| Russia                | 143.6             | 0.0         | 76.1         | 113.7        | 125.6        | 127.8        | 142.2         | 142.0                 | 141.9                  |
| Rwanda                | 10.8              | 0.0         | 1.8          | 3.0          | 4.9          | 5.1          | 8.4           | 8.3                   | 8.3                    |
| Saint Kitts and Nevis | 0.1               | 0.0         | 0.0          | 0.0          | 0.0          | 0.0          | 0.0           | 0.0                   | 0.0                    |
| Saint Lucia           | 0.2               | 0.0         | 0.0          | 0.0          | 0.0          | 0.0          | 0.0           | 0.0                   | 0.0                    |
| Saudi Arabia          | 27.3              | 0.0         | 0.0          | 0.0          | 0.0          | 0.0          | 8.7           | 5.7                   | 2.7                    |
| Senegal               | 13.0              | 0.0         | 0.2          | 0.0          | 0.0          | 0.0          | 2.0           | 1.1                   | 0.3                    |



| <b>Nation</b>                | <b>Population</b> | <b>5 Tg</b> | <b>16 Tg</b> | <b>27 Tg</b>  | <b>37 Tg</b>  | <b>47 Tg</b>  | <b>150 Tg</b> | <b>150 Tg<br/>+hw</b> | <b>150 Tg<br/>+ tw</b> |
|------------------------------|-------------------|-------------|--------------|---------------|---------------|---------------|---------------|-----------------------|------------------------|
| Serbia                       | 9.6               | 0.0         | 3.9          | 5.5           | 7.1           | 7.5           | 9.5           | 9.5                   | 9.5                    |
| Sierra Leone                 | 5.8               | 0.0         | 0.0          | 0.0           | 0.0           | 0.0           | 4.3           | 4.2                   | 4.1                    |
| Slovakia                     | 5.4               | 0.0         | 0.7          | 1.1           | 3.7           | 3.9           | 5.4           | 5.4                   | 5.4                    |
| Slovenia                     | 2.1               | 0.0         | 0.6          | 0.9           | 1.4           | 1.4           | 2.0           | 2.0                   | 2.0                    |
| Solomon Islands              | 0.5               | 0.0         | 0.0          | 0.0           | 0.0           | 0.0           | 0.0           | 0.0                   | 0.0                    |
| South Africa                 | 51.5              | 0.0         | 1.8          | 7.4           | 13.4          | 19.0          | 41.2          | 39.6                  | 37.9                   |
| South Korea                  | 48.5              | 0.0         | 19.2         | 25.4          | 40.8          | 47.1          | 48.0          | 47.9                  | 47.9                   |
| Spain                        | 46.2              | 0.0         | 0.0          | 0.0           | 0.0           | 0.0           | 40.7          | 40.0                  | 39.3                   |
| Sri Lanka                    | 20.8              | 0.5         | 0.0          | 0.0           | 0.0           | 0.0           | 1.8           | 0.4                   | 0.0                    |
| Suriname                     | 0.5               | 0.0         | 0.0          | 0.0           | 0.0           | 0.0           | 0.0           | 0.0                   | 0.0                    |
| Sweden                       | 9.4               | 1.3         | 6.9          | 9.1           | 9.2           | 9.2           | 9.3           | 9.3                   | 9.3                    |
| Switzerland                  | 7.8               | 0.0         | 0.9          | 1.8           | 5.0           | 4.8           | 7.7           | 7.7                   | 7.7                    |
| Taiwan, province of<br>China | 23.1              | 0.0         | 7.4          | 9.3           | 14.8          | 17.0          | 21.9          | 21.7                  | 21.6                   |
| Tajikistan                   | 7.6               | 0.1         | 2.5          | 3.3           | 4.1           | 5.6           | 7.6           | 7.6                   | 7.6                    |
| Tanzania                     | 45.0              | 0.0         | 11.6         | 14.0          | 16.2          | 19.9          | 34.4          | 34.3                  | 34.2                   |
| Thailand                     | 66.4              | 1.7         | 7.6          | 9.6           | 16.8          | 29.9          | 64.8          | 64.6                  | 64.4                   |
| Togo                         | 6.3               | 0.0         | 0.0          | 0.0           | 0.0           | 0.0           | 3.5           | 3.3                   | 3.2                    |
| Trinidad and Tobago          | 1.3               | 0.0         | 0.0          | 0.0           | 0.0           | 0.0           | 0.0           | 0.0                   | 0.0                    |
| Tunisia                      | 10.6              | 0.0         | 0.0          | 0.0           | 0.0           | 0.0           | 5.5           | 4.6                   | 3.7                    |
| Turkey                       | 72.1              | 0.0         | 0.0          | 0.0           | 0.0           | 0.0           | 70.3          | 69.8                  | 69.4                   |
| Turkmenistan                 | 5.0               | 0.3         | 1.5          | 2.0           | 2.1           | 2.2           | 5.0           | 5.0                   | 5.0                    |
| Uganda                       | 34.0              | 0.0         | 6.1          | 11.3          | 18.6          | 23.8          | 32.9          | 32.8                  | 32.7                   |
| Ukraine                      | 46.1              | 0.0         | 1.0          | 4.1           | 28.6          | 29.0          | 45.9          | 45.9                  | 45.9                   |
| United Arab Emirates         | 8.4               | 0.0         | 0.0          | 0.0           | 2.7           | 5.5           | 7.2           | 7.1                   | 7.0                    |
| United Kingdom               | 62.3              | 0.0         | 6.9          | 15.4          | 28.7          | 40.9          | 54.3          | 53.0                  | 51.6                   |
| United States                | 312.2             | 0.0         | 86.4         | 152.3         | 207.1         | 251.6         | 305.6         | 304.3                 | 303.0                  |
| Uruguay                      | 3.4               | 0.0         | 0.0          | 0.0           | 0.0           | 0.6           | 1.6           | 1.5                   | 1.3                    |
| Uzbekistan                   | 27.8              | 0.0         | 1.6          | 4.6           | 5.2           | 7.1           | 27.8          | 27.8                  | 27.8                   |
| Venezuela                    | 29.0              | 0.0         | 0.0          | 0.0           | 0.0           | 0.0           | 18.4          | 17.2                  | 16.0                   |
| Vietnam                      | 89.0              | 0.0         | 23.2         | 37.4          | 42.8          | 54.5          | 85.3          | 84.9                  | 84.4                   |
| Yemen                        | 22.8              | 0.0         | 0.0          | 0.0           | 0.0           | 0.0           | 11.6          | 11.2                  | 10.8                   |
| Zambia                       | 13.2              | 0.0         | 0.0          | 1.2           | 2.7           | 4.7           | 8.7           | 8.7                   | 8.7                    |
| Zimbabwe                     | 13.1              | 0.0         | 0.0          | 0.0           | 0.5           | 3.2           | 8.0           | 8.0                   | 8.0                    |
| <b>Total</b>                 | <b>6700.1</b>     | <b>17.1</b> | <b>953.6</b> | <b>1521.6</b> | <b>2155.8</b> | <b>2684.4</b> | <b>5422.7</b> | <b>5292.6</b>         | <b>5163.5</b>          |



| <b>Nation</b>      | <b>Population</b> | <b>5 Tg</b> | <b>16 Tg</b> | <b>27 Tg</b> | <b>37 Tg</b> | <b>47 Tg</b> | <b>150 Tg</b> | <b>150 Tg +<br/>hw</b> | <b>150 Tg<br/>+ tw</b> |
|--------------------|-------------------|-------------|--------------|--------------|--------------|--------------|---------------|------------------------|------------------------|
| Croatia            | 4.3               | 0.0         | 0.0          | 0.0          | 1.4          | 1.4          | 4.3           | 4.3                    | 4.3                    |
| Cuba               | 11.3              | 0.0         | 0.0          | 0.0          | 0.0          | 0.0          | 6.2           | 5.5                    | 4.7                    |
| Cyprus             | 1.1               | 0.0         | 0.0          | 0.0          | 0.0          | 0.0          | 0.2           | 0.2                    | 0.1                    |
| Czech Republic     | 10.6              | 0.0         | 0.0          | 0.0          | 8.9          | 7.9          | 10.5          | 10.5                   | 10.5                   |
| Denmark            | 5.6               | 0.0         | 0.0          | 0.6          | 5.2          | 5.3          | 5.4           | 5.4                    | 5.4                    |
| Dominican Republic | 10.0              | 0.0         | 0.0          | 0.0          | 0.0          | 0.0          | 0.0           | 0.0                    | 0.0                    |
| Ecuador            | 15.0              | 0.0         | 0.0          | 0.0          | 0.0          | 0.0          | 8.7           | 8.5                    | 8.2                    |
| Egypt              | 78.1              | 0.0         | 0.0          | 0.0          | 0.0          | 0.0          | 57.9          | 52.8                   | 47.6                   |
| El Salvador        | 6.2               | 0.0         | 0.0          | 0.0          | 0.0          | 0.0          | 4.1           | 4.0                    | 3.8                    |
| Estonia            | 1.3               | 0.0         | 0.7          | 1.3          | 1.3          | 1.3          | 1.3           | 1.3                    | 1.3                    |
| Ethiopia           | 87.1              | 0.0         | 1.4          | 15.9         | 21.8         | 40.2         | 76.4          | 76.3                   | 76.2                   |
| Finland            | 5.4               | 0.0         | 5.2          | 5.3          | 5.3          | 5.3          | 5.3           | 5.3                    | 5.3                    |
| France             | 63.2              | 0.0         | 0.0          | 0.0          | 0.0          | 0.0          | 62.2          | 62.0                   | 61.8                   |
| French Polynesia   | 0.3               | 0.0         | 0.0          | 0.0          | 0.0          | 0.0          | 0.0           | 0.0                    | 0.0                    |
| Gabon              | 1.6               | 0.0         | 0.0          | 0.0          | 0.0          | 0.0          | 0.9           | 0.8                    | 0.7                    |
| Gambia             | 1.7               | 0.0         | 0.8          | 0.2          | 0.0          | 0.2          | 0.0           | 0.0                    | 0.0                    |
| Georgia            | 4.4               | 0.0         | 0.0          | 1.5          | 2.3          | 2.6          | 4.4           | 4.4                    | 4.4                    |
| Germany            | 83.0              | 0.0         | 0.0          | 0.0          | 54.4         | 57.8         | 82.5          | 82.4                   | 82.3                   |
| Ghana              | 24.3              | 0.0         | 0.0          | 0.0          | 0.0          | 0.0          | 14.0          | 12.0                   | 10.0                   |
| Greece             | 11.1              | 0.0         | 0.0          | 0.0          | 0.0          | 0.0          | 10.2          | 10.1                   | 9.9                    |
| Grenada            | 0.1               | 0.0         | 0.0          | 0.0          | 0.0          | 0.0          | 0.0           | 0.0                    | 0.0                    |
| Guatemala          | 14.3              | 0.0         | 0.0          | 0.0          | 0.0          | 0.0          | 10.6          | 10.3                   | 10.0                   |
| Guinea             | 10.9              | 0.0         | 0.0          | 0.0          | 0.0          | 0.0          | 8.3           | 8.0                    | 7.7                    |
| Guinea-Bissau      | 1.6               | 0.0         | 0.0          | 0.0          | 0.0          | 0.0          | 0.0           | 0.0                    | 0.0                    |
| Guyana             | 0.8               | 0.0         | 0.0          | 0.0          | 0.0          | 0.0          | 0.0           | 0.0                    | 0.0                    |
| Haiti              | 9.9               | 0.0         | 0.0          | 0.0          | 0.0          | 0.0          | 0.0           | 0.0                    | 0.0                    |
| Honduras           | 7.6               | 0.0         | 0.0          | 0.0          | 0.0          | 0.0          | 4.7           | 4.5                    | 4.2                    |
| Hungary            | 10.0              | 0.0         | 0.0          | 0.4          | 4.9          | 5.7          | 10.0          | 10.0                   | 10.0                   |
| Iceland            | 0.3               | 0.0         | 0.0          | 0.0          | 0.0          | 0.0          | 0.0           | 0.0                    | 0.0                    |
| India              | 1205.6            | 0.0         | 0.0          | 0.0          | 0.0          | 90.5         | 731.4         | 692.3                  | 653.2                  |
| Indonesia          | 240.7             | 0.0         | 0.0          | 0.0          | 0.0          | 15.0         | 132.5         | 119.7                  | 106.8                  |
| Iran               | 74.5              | 0.0         | 0.0          | 0.0          | 0.0          | 0.8          | 72.4          | 72.1                   | 71.8                   |
| Iraq               | 31.0              | 0.0         | 0.0          | 0.0          | 0.3          | 0.0          | 30.7          | 30.7                   | 30.7                   |
| Ireland            | 4.5               | 0.0         | 0.0          | 0.0          | 0.0          | 0.7          | 4.2           | 4.1                    | 4.1                    |
| Israel             | 7.4               | 0.0         | 0.0          | 0.0          | 0.0          | 0.0          | 5.3           | 4.9                    | 4.4                    |
| Italy              | 60.5              | 0.0         | 0.0          | 0.0          | 7.2          | 5.6          | 57.7          | 57.1                   | 56.5                   |
| Jamaica            | 2.7               | 0.0         | 0.0          | 0.0          | 0.0          | 0.0          | 0.0           | 0.0                    | 0.0                    |
| Japan              | 127.4             | 0.0         | 39.3         | 73.6         | 99.1         | 109.8        | 123.6         | 123.2                  | 122.9                  |
| Jordan             | 6.5               | 0.0         | 0.0          | 0.0          | 0.0          | 0.0          | 6.1           | 6.1                    | 6.0                    |
| Kazakhstan         | 15.9              | 0.0         | 0.0          | 2.9          | 8.1          | 12.3         | 15.9          | 15.9                   | 15.9                   |
| Kenya              | 40.9              | 0.0         | 3.4          | 5.4          | 9.9          | 13.9         | 33.3          | 33.2                   | 33.0                   |
| Kuwait             | 3.0               | 0.0         | 0.0          | 0.0          | 0.0          | 0.0          | 2.9           | 2.9                    | 2.9                    |
| Kyrgyzstan         | 5.3               | 0.0         | 0.0          | 1.2          | 2.6          | 4.0          | 5.3           | 5.3                    | 5.3                    |
| Laos               | 6.4               | 0.0         | 1.5          | 2.1          | 2.4          | 3.3          | 6.3           | 6.3                    | 6.3                    |



| <b>Nation</b>             | <i>Population</i> | <b>5 Tg</b> | <b>16 Tg</b> | <b>27 Tg</b>  | <b>37 Tg</b>  | <b>47 Tg</b>  | <b>150 Tg</b> | <b>150 Tg +<br/>hw</b> | <b>150 Tg<br/>+ tw</b> |
|---------------------------|-------------------|-------------|--------------|---------------|---------------|---------------|---------------|------------------------|------------------------|
| Senegal                   | 13.0              | 0.0         | 0.0          | 0.0           | 0.0           | 0.0           | 1.5           | 0.6                    | 0.0                    |
| Serbia                    | 9.6               | 0.0         | 0.0          | 1.9           | 5.3           | 6.0           | 9.6           | 9.6                    | 9.6                    |
| Sierra Leone              | 5.8               | 0.0         | 0.0          | 0.0           | 0.0           | 0.0           | 4.1           | 4.1                    | 4.0                    |
| Slovakia                  | 5.4               | 0.0         | 0.0          | 0.0           | 3.0           | 3.1           | 5.4           | 5.4                    | 5.4                    |
| Slovenia                  | 2.1               | 0.0         | 0.4          | 0.7           | 1.4           | 1.3           | 2.0           | 2.0                    | 2.0                    |
| Solomon Islands           | 0.5               | 0.0         | 0.0          | 0.0           | 0.0           | 0.0           | 0.0           | 0.0                    | 0.0                    |
| South Africa              | 51.5              | 0.0         | 0.0          | 0.2           | 7.3           | 14.1          | 40.6          | 38.8                   | 37.1                   |
| South Korea               | 48.5              | 0.0         | 10.8         | 19.1          | 39.9          | 47.1          | 48.1          | 48.0                   | 47.9                   |
| Spain                     | 46.2              | 0.0         | 0.0          | 0.0           | 0.0           | 0.0           | 40.7          | 40.0                   | 39.3                   |
| Sri Lanka                 | 20.8              | 0.0         | 0.0          | 0.0           | 0.0           | 0.0           | 1.2           | 0.0                    | 0.0                    |
| Suriname                  | 0.5               | 0.0         | 0.0          | 0.0           | 0.0           | 0.0           | 0.0           | 0.0                    | 0.0                    |
| Sweden                    | 9.4               | 0.0         | 6.0          | 9.1           | 9.2           | 9.2           | 9.3           | 9.3                    | 9.3                    |
| Switzerland               | 7.8               | 0.0         | 0.2          | 1.0           | 5.1           | 4.7           | 7.8           | 7.8                    | 7.8                    |
| Taiwan, province of China | 23.1              | 0.0         | 0.8          | 3.7           | 12.0          | 15.2          | 22.3          | 22.2                   | 22.1                   |
| Tajikistan                | 7.6               | 0.0         | 1.0          | 1.9           | 3.0           | 4.9           | 7.6           | 7.6                    | 7.6                    |
| Tanzania                  | 45.0              | 0.0         | 10.2         | 12.8          | 15.1          | 19.1          | 34.6          | 34.5                   | 34.4                   |
| Thailand                  | 66.4              | 0.0         | 0.0          | 0.0           | 2.6           | 19.4          | 65.0          | 64.8                   | 64.7                   |
| Togo                      | 6.3               | 0.0         | 0.0          | 0.0           | 0.0           | 0.0           | 3.3           | 3.2                    | 3.0                    |
| Trinidad and Tobago       | 1.3               | 0.0         | 0.0          | 0.0           | 0.0           | 0.0           | 0.0           | 0.0                    | 0.0                    |
| Tunisia                   | 10.6              | 0.0         | 0.0          | 0.0           | 0.0           | 0.0           | 4.4           | 3.2                    | 2.1                    |
| Turkey                    | 72.1              | 0.0         | 0.0          | 0.0           | 0.0           | 0.0           | 70.6          | 70.3                   | 69.9                   |
| Turkmenistan              | 5.0               | 0.0         | 0.0          | 0.0           | 0.2           | 0.3           | 5.0           | 5.0                    | 5.0                    |
| Uganda                    | 34.0              | 0.0         | 6.0          | 11.2          | 18.8          | 23.8          | 33.0          | 33.0                   | 32.9                   |
| Ukraine                   | 46.1              | 0.0         | 0.0          | 0.0           | 15.8          | 15.8          | 45.9          | 45.9                   | 45.9                   |
| United Arab Emirates      | 8.4               | 0.0         | 0.0          | 0.0           | 2.4           | 6.0           | 7.8           | 7.7                    | 7.6                    |
| United Kingdom            | 62.3              | 0.0         | 0.0          | 3.6           | 22.8          | 40.2          | 58.2          | 57.5                   | 56.8                   |
| United States             | 312.2             | 0.0         | 0.0          | 45.3          | 153.3         | 226.5         | 307.3         | 306.3                  | 305.3                  |
| Uruguay                   | 3.4               | 0.0         | 0.0          | 0.0           | 0.0           | 0.0           | 1.0           | 0.8                    | 0.6                    |
| Uzbekistan                | 27.8              | 0.0         | 0.0          | 0.0           | 0.0           | 1.3           | 27.8          | 27.8                   | 27.8                   |
| Venezuela                 | 29.0              | 0.0         | 0.0          | 0.0           | 0.0           | 0.0           | 17.2          | 15.9                   | 14.5                   |
| Vietnam                   | 89.0              | 0.0         | 15.5         | 31.7          | 37.9          | 50.9          | 85.9          | 85.5                   | 85.1                   |
| Yemen                     | 22.8              | 0.0         | 0.0          | 0.0           | 0.0           | 0.0           | 11.3          | 10.8                   | 10.4                   |
| Zambia                    | 13.2              | 0.0         | 0.0          | 0.7           | 2.2           | 4.4           | 8.6           | 8.6                    | 8.6                    |
| Zimbabwe                  | 13.1              | 0.0         | 0.0          | 0.0           | 0.0           | 2.9           | 8.0           | 8.0                    | 8.0                    |
| <b>Total</b>              | <b>6700.1</b>     | <b>4.2</b>  | <b>626.4</b> | <b>1162.2</b> | <b>1861.2</b> | <b>2352.5</b> | <b>5321.2</b> | <b>5182.2</b>          | <b>5044.8</b>          |

**Table S9.** Number of people who would die from starvation (millions) after the simulated nuclear war in Year 2 for all nations, assuming that trade would continue, under the *No Livestock* case (assuming livestock is killed in Year 1 and 50% of livestock grain feed is used for human consumption). The second column is the population in millions in 2010<sup>42</sup>. 150 Tg + hw is half of the household waste added to food consumption, and 150 Tg + tw is total household waste added to food consumption. Bold is used for headings and global averages, and italic is used for population in 2010.

| <b>Nation</b>            | <i>Population</i> | <b>5 Tg</b> | <b>16 Tg</b> | <b>27 Tg</b> | <b>37 Tg</b> | <b>47 Tg</b> | <b>150 Tg</b> | <b>150 Tg + hw</b> | <b>150 Tg + tw</b> |
|--------------------------|-------------------|-------------|--------------|--------------|--------------|--------------|---------------|--------------------|--------------------|
| Afghanistan              | <i>28.4</i>       | 1.8         | 3.5          | 5.0          | 5.7          | 6.9          | 28.4          | 28.4               | 28.4               |
| Albania                  | <i>3.2</i>        | 0.0         | 0.0          | 0.0          | 0.1          | 0.0          | 3.1           | 3.1                | 3.1                |
| Algeria                  | <i>37.1</i>       | 0.0         | 0.0          | 0.0          | 0.0          | 0.0          | 16.9          | 13.7               | 10.4               |
| Angola                   | <i>19.5</i>       | 0.0         | 0.0          | 0.0          | 0.0          | 3.4          | 11.3          | 10.7               | 10.1               |
| Antigua and Barbuda      | <i>0.1</i>        | 0.0         | 0.0          | 0.0          | 0.0          | 0.0          | 0.0           | 0.0                | 0.0                |
| Argentina                | <i>40.4</i>       | 0.0         | 0.0          | 0.0          | 0.0          | 0.0          | 21.6          | 19.2               | 16.8               |
| Armenia                  | <i>3.0</i>        | 0.0         | 0.0          | 0.0          | 0.0          | 0.7          | 3.0           | 3.0                | 3.0                |
| Australia                | <i>22.4</i>       | 0.0         | 0.0          | 0.0          | 0.0          | 0.0          | 0.0           | 0.0                | 0.0                |
| Austria                  | <i>8.4</i>        | 0.0         | 2.4          | 3.4          | 7.3          | 7.1          | 8.4           | 8.4                | 8.4                |
| Azerbaijan               | <i>9.1</i>        | 0.0         | 0.0          | 0.0          | 0.0          | 0.3          | 9.1           | 9.1                | 9.1                |
| Bahamas                  | <i>0.4</i>        | 0.0         | 0.0          | 0.0          | 0.0          | 0.0          | 0.0           | 0.0                | 0.0                |
| Bangladesh               | <i>151.1</i>      | 0.0         | 0.0          | 0.0          | 0.0          | 0.0          | 146.1         | 145.7              | 145.2              |
| Barbados                 | <i>0.3</i>        | 0.0         | 0.0          | 0.0          | 0.0          | 0.0          | 0.0           | 0.0                | 0.0                |
| Belarus                  | <i>9.5</i>        | 0.0         | 0.0          | 0.0          | 8.4          | 9.4          | 9.5           | 9.5                | 9.5                |
| Belgium                  | <i>10.9</i>       | 0.0         | 0.0          | 0.0          | 0.0          | 2.9          | 10.9          | 10.9               | 10.9               |
| Belize                   | <i>0.3</i>        | 0.0         | 0.0          | 0.0          | 0.0          | 0.0          | 0.2           | 0.2                | 0.2                |
| Benin                    | <i>9.5</i>        | 0.0         | 0.0          | 0.0          | 0.0          | 0.0          | 4.5           | 3.9                | 3.4                |
| Bermuda                  | <i>0.1</i>        | 0.0         | 0.0          | 0.0          | 0.0          | 0.0          | 0.0           | 0.0                | 0.0                |
| Bolivia                  | <i>10.2</i>       | 0.0         | 0.0          | 1.1          | 2.4          | 2.8          | 6.7           | 6.7                | 6.7                |
| Bosnia and Herzegovina   | <i>3.8</i>        | 0.0         | 0.0          | 1.8          | 2.7          | 2.7          | 3.8           | 3.8                | 3.8                |
| Botswana                 | <i>2.0</i>        | 0.0         | 0.0          | 0.0          | 0.1          | 0.3          | 1.3           | 1.3                | 1.3                |
| Brazil                   | <i>195.2</i>      | 0.0         | 0.0          | 0.0          | 0.0          | 0.0          | 95.2          | 78.6               | 62.0               |
| Brunei                   | <i>0.4</i>        | 0.0         | 0.0          | 0.0          | 0.0          | 0.0          | 0.0           | 0.0                | 0.0                |
| Bulgaria                 | <i>7.4</i>        | 0.0         | 0.0          | 0.0          | 0.0          | 0.0          | 7.4           | 7.4                | 7.4                |
| Burkina Faso             | <i>15.5</i>       | 0.0         | 0.0          | 0.0          | 0.0          | 0.0          | 10.2          | 9.4                | 8.7                |
| Cambodia                 | <i>14.4</i>       | 0.5         | 0.4          | 0.0          | 1.4          | 5.6          | 13.4          | 13.3               | 13.2               |
| Cameroon                 | <i>20.6</i>       | 0.0         | 0.0          | 0.0          | 0.0          | 0.0          | 16.2          | 15.8               | 15.4               |
| Canada                   | <i>34.1</i>       | 0.0         | 19.3         | 31.3         | 33.7         | 33.8         | 34.0          | 33.9               | 33.9               |
| Cape Verde               | <i>0.5</i>        | 0.0         | 0.0          | 0.0          | 0.0          | 0.0          | 0.0           | 0.0                | 0.0                |
| Central African Republic | <i>4.4</i>        | 0.0         | 0.0          | 0.8          | 0.7          | 1.0          | 3.6           | 3.5                | 3.5                |
| Chad                     | <i>11.7</i>       | 0.0         | 0.0          | 0.0          | 0.0          | 0.0          | 7.8           | 7.8                | 7.8                |
| Chile                    | <i>17.2</i>       | 0.0         | 0.0          | 0.0          | 0.0          | 0.0          | 9.6           | 8.9                | 8.2                |
| China                    | <i>1367.4</i>     | 0.0         | 494.7        | 778.9        | 1005.6       | 1097.6       | 1361.9        | 1361.1             | 1360.3             |
| Colombia                 | <i>46.4</i>       | 0.0         | 0.0          | 0.0          | 3.1          | 6.2          | 38.3          | 37.7               | 37.2               |
| Republic of Congo        | <i>4.1</i>        | 0.0         | 0.0          | 0.3          | 0.3          | 0.6          | 2.8           | 2.8                | 2.8                |
| Costa Rica               | <i>4.7</i>        | 0.3         | 0.0          | 0.0          | 0.0          | 0.0          | 0.0           | 0.0                | 0.0                |

| <b>Nation</b>      | <b>Population</b> | <b>5 Tg</b> | <b>16 Tg</b> | <b>27 Tg</b> | <b>37 Tg</b> | <b>47 Tg</b> | <b>150 Tg</b> | <b>150 Tg<br/>+ hw</b> | <b>150 Tg<br/>+ tw</b> |
|--------------------|-------------------|-------------|--------------|--------------|--------------|--------------|---------------|------------------------|------------------------|
| Croatia            | 4.3               | 0.0         | 0.0          | 0.0          | 1.7          | 1.7          | 4.3           | 4.3                    | 4.3                    |
| Cuba               | 11.3              | 0.0         | 0.0          | 0.0          | 0.0          | 0.0          | 6.6           | 6.0                    | 5.3                    |
| Cyprus             | 1.1               | 0.0         | 0.0          | 0.0          | 0.0          | 0.0          | 0.3           | 0.3                    | 0.2                    |
| Czech Republic     | 10.6              | 0.0         | 0.0          | 0.0          | 9.3          | 8.2          | 10.5          | 10.5                   | 10.5                   |
| Denmark            | 5.6               | 0.0         | 0.0          | 0.8          | 5.3          | 5.3          | 5.4           | 5.4                    | 5.4                    |
| Dominican Republic | 10.0              | 0.0         | 0.0          | 0.0          | 0.0          | 0.0          | 0.0           | 0.0                    | 0.0                    |
| Ecuador            | 15.0              | 0.0         | 0.0          | 0.4          | 0.4          | 1.5          | 10.2          | 10.1                   | 9.9                    |
| Egypt              | 78.1              | 0.0         | 0.0          | 0.0          | 0.0          | 0.0          | 58.3          | 53.3                   | 48.3                   |
| El Salvador        | 6.2               | 0.0         | 0.0          | 0.0          | 0.0          | 0.0          | 4.5           | 4.4                    | 4.3                    |
| Estonia            | 1.3               | 0.0         | 0.8          | 1.3          | 1.3          | 1.3          | 1.3           | 1.3                    | 1.3                    |
| Ethiopia           | 87.1              | 0.0         | 4.3          | 18.6         | 24.5         | 42.6         | 77.6          | 77.5                   | 77.5                   |
| Finland            | 5.4               | 0.3         | 5.3          | 5.3          | 5.3          | 5.3          | 5.3           | 5.3                    | 5.3                    |
| France             | 63.2              | 0.0         | 0.0          | 0.0          | 0.0          | 0.0          | 62.8          | 62.7                   | 62.6                   |
| French Polynesia   | 0.3               | 0.0         | 0.0          | 0.0          | 0.0          | 0.0          | 0.0           | 0.0                    | 0.0                    |
| Gabon              | 1.6               | 0.0         | 0.0          | 0.0          | 0.0          | 0.1          | 0.9           | 0.9                    | 0.8                    |
| Gambia             | 1.7               | 0.0         | 0.9          | 0.2          | 0.0          | 0.3          | 0.0           | 0.0                    | 0.0                    |
| Georgia            | 4.4               | 0.0         | 0.2          | 1.8          | 2.6          | 2.8          | 4.4           | 4.4                    | 4.4                    |
| Germany            | 83.0              | 0.0         | 0.0          | 0.0          | 58.3         | 60.8         | 82.5          | 82.4                   | 82.3                   |
| Ghana              | 24.3              | 0.0         | 0.0          | 0.0          | 0.0          | 0.0          | 14.1          | 12.2                   | 10.2                   |
| Greece             | 11.1              | 0.0         | 0.0          | 0.0          | 0.0          | 0.0          | 10.5          | 10.4                   | 10.3                   |
| Grenada            | 0.1               | 0.0         | 0.0          | 0.0          | 0.0          | 0.0          | 0.0           | 0.0                    | 0.0                    |
| Guatemala          | 14.3              | 0.0         | 0.0          | 0.0          | 0.0          | 0.0          | 11.0          | 10.8                   | 10.5                   |
| Guinea             | 10.9              | 0.0         | 0.0          | 0.0          | 0.0          | 0.0          | 8.3           | 8.0                    | 7.8                    |
| Guinea-Bissau      | 1.6               | 0.0         | 0.0          | 0.0          | 0.0          | 0.0          | 0.0           | 0.0                    | 0.0                    |
| Guyana             | 0.8               | 0.0         | 0.0          | 0.0          | 0.0          | 0.0          | 0.0           | 0.0                    | 0.0                    |
| Haiti              | 9.9               | 0.0         | 0.0          | 0.0          | 0.0          | 0.0          | 0.0           | 0.0                    | 0.0                    |
| Honduras           | 7.6               | 0.0         | 0.0          | 0.0          | 0.0          | 0.0          | 5.1           | 4.9                    | 4.7                    |
| Hungary            | 10.0              | 0.0         | 0.0          | 1.5          | 5.6          | 6.0          | 10.0          | 10.0                   | 10.0                   |
| Iceland            | 0.3               | 0.0         | 0.0          | 0.0          | 0.0          | 0.0          | 0.0           | 0.0                    | 0.0                    |
| India              | 1205.6            | 0.0         | 0.0          | 0.0          | 0.0          | 121.7        | 741.9         | 703.7                  | 665.4                  |
| Indonesia          | 240.7             | 0.0         | 0.0          | 0.0          | 0.0          | 19.6         | 135.3         | 122.7                  | 110.2                  |
| Iran               | 74.5              | 0.0         | 0.0          | 0.0          | 0.0          | 3.1          | 72.5          | 72.2                   | 72.0                   |
| Iraq               | 31.0              | 0.0         | 0.0          | 0.0          | 0.7          | 0.1          | 30.8          | 30.8                   | 30.7                   |
| Ireland            | 4.5               | 0.0         | 0.0          | 0.0          | 0.0          | 1.1          | 4.5           | 4.5                    | 4.4                    |
| Israel             | 7.4               | 0.0         | 0.0          | 0.0          | 0.0          | 0.0          | 5.9           | 5.5                    | 5.2                    |
| Italy              | 60.5              | 0.0         | 0.0          | 0.0          | 13.5         | 11.3         | 58.8          | 58.5                   | 58.1                   |
| Jamaica            | 2.7               | 0.0         | 0.0          | 0.0          | 0.0          | 0.0          | 0.0           | 0.0                    | 0.0                    |
| Japan              | 127.4             | 0.0         | 45.4         | 78.5         | 102.5        | 112.3        | 124.1         | 123.9                  | 123.6                  |
| Jordan             | 6.5               | 0.0         | 0.0          | 0.0          | 0.0          | 0.0          | 6.2           | 6.2                    | 6.1                    |
| Kazakhstan         | 15.9              | 0.0         | 0.0          | 4.6          | 9.6          | 13.5         | 15.9          | 15.9                   | 15.9                   |
| Kenya              | 40.9              | 0.0         | 6.0          | 8.1          | 12.2         | 15.8         | 34.4          | 34.3                   | 34.2                   |
| Kuwait             | 3.0               | 0.0         | 0.0          | 0.0          | 0.0          | 0.0          | 3.0           | 3.0                    | 3.0                    |
| Kyrgyzstan         | 5.3               | 0.0         | 0.0          | 1.8          | 3.1          | 4.4          | 5.3           | 5.3                    | 5.3                    |
| Laos               | 6.4               | 0.0         | 1.7          | 2.3          | 2.6          | 3.4          | 6.4           | 6.4                    | 6.4                    |





| <b>Nation</b>             | <b>Population</b> | <b>5 Tg</b> | <b>16 Tg</b> | <b>27 Tg</b>  | <b>37 Tg</b>  | <b>47 Tg</b>  | <b>150 Tg</b> | <b>150 Tg<br/>+ hw</b> | <b>150 Tg<br/>+ tw</b> |
|---------------------------|-------------------|-------------|--------------|---------------|---------------|---------------|---------------|------------------------|------------------------|
| Senegal                   | 13.0              | 0.0         | 0.0          | 0.0           | 0.0           | 0.0           | 1.8           | 1.0                    | 0.1                    |
| Serbia                    | 9.6               | 0.0         | 0.3          | 2.7           | 5.8           | 6.5           | 9.6           | 9.6                    | 9.6                    |
| Sierra Leone              | 5.8               | 0.0         | 0.0          | 0.0           | 0.0           | 0.0           | 4.2           | 4.1                    | 4.0                    |
| Slovakia                  | 5.4               | 0.0         | 0.0          | 0.0           | 3.3           | 3.3           | 5.4           | 5.4                    | 5.4                    |
| Slovenia                  | 2.1               | 0.0         | 0.6          | 0.9           | 1.6           | 1.5           | 2.1           | 2.1                    | 2.1                    |
| Solomon Islands           | 0.5               | 0.0         | 0.0          | 0.0           | 0.0           | 0.0           | 0.0           | 0.0                    | 0.0                    |
| South Africa              | 51.5              | 0.0         | 0.0          | 3.8           | 10.6          | 17.0          | 42.1          | 40.5                   | 39.0                   |
| South Korea               | 48.5              | 0.0         | 12.9         | 20.8          | 40.9          | 47.2          | 48.1          | 48.0                   | 47.9                   |
| Spain                     | 46.2              | 0.0         | 0.0          | 0.0           | 0.0           | 0.0           | 42.4          | 42.0                   | 41.5                   |
| Sri Lanka                 | 20.8              | 0.5         | 0.0          | 0.0           | 0.0           | 0.0           | 1.5           | 0.1                    | 0.0                    |
| Suriname                  | 0.5               | 0.0         | 0.0          | 0.0           | 0.0           | 0.0           | 0.0           | 0.0                    | 0.0                    |
| Sweden                    | 9.4               | 0.0         | 6.2          | 9.1           | 9.2           | 9.2           | 9.3           | 9.3                    | 9.3                    |
| Switzerland               | 7.8               | 0.0         | 1.5          | 2.0           | 5.8           | 5.5           | 7.8           | 7.8                    | 7.8                    |
| Taiwan, province of China | 23.1              | 0.0         | 2.6          | 5.3           | 13.1          | 16.1          | 22.8          | 22.7                   | 22.7                   |
| Tajikistan                | 7.6               | 0.0         | 1.4          | 2.2           | 3.3           | 5.0           | 7.6           | 7.6                    | 7.6                    |
| Tanzania                  | 45.0              | 0.0         | 11.4         | 14.1          | 16.3          | 20.1          | 35.5          | 35.4                   | 35.3                   |
| Thailand                  | 66.4              | 0.0         | 0.0          | 0.0           | 5.2           | 21.2          | 65.3          | 65.2                   | 65.1                   |
| Togo                      | 6.3               | 0.0         | 0.0          | 0.0           | 0.0           | 0.0           | 3.4           | 3.2                    | 3.1                    |
| Trinidad and Tobago       | 1.3               | 0.0         | 0.0          | 0.0           | 0.0           | 0.0           | 0.0           | 0.0                    | 0.0                    |
| Tunisia                   | 10.6              | 0.0         | 0.0          | 0.0           | 0.0           | 0.0           | 4.8           | 3.7                    | 2.7                    |
| Turkey                    | 72.1              | 0.0         | 0.0          | 0.0           | 0.0           | 0.0           | 71.2          | 71.0                   | 70.7                   |
| Turkmenistan              | 5.0               | 0.0         | 0.0          | 0.0           | 0.2           | 0.3           | 5.0           | 5.0                    | 5.0                    |
| Uganda                    | 34.0              | 0.1         | 7.0          | 12.1          | 19.6          | 24.2          | 33.2          | 33.1                   | 33.1                   |
| Ukraine                   | 46.1              | 0.0         | 0.0          | 0.0           | 17.3          | 17.0          | 45.9          | 45.9                   | 45.9                   |
| United Arab Emirates      | 8.4               | 0.0         | 0.0          | 0.0           | 3.3           | 6.9           | 8.3           | 8.3                    | 8.3                    |
| United Kingdom            | 62.3              | 0.0         | 0.6          | 11.3          | 29.4          | 45.6          | 62.1          | 62.0                   | 62.0                   |
| United States             | 312.2             | 0.0         | 0.0          | 73.9          | 176.1         | 240.7         | 309.5         | 308.9                  | 308.3                  |
| Uruguay                   | 3.4               | 0.0         | 0.0          | 0.0           | 0.0           | 0.0           | 1.3           | 1.1                    | 0.9                    |
| Uzbekistan                | 27.8              | 0.0         | 0.0          | 0.1           | 0.5           | 2.6           | 27.8          | 27.8                   | 27.8                   |
| Venezuela                 | 29.0              | 0.0         | 0.0          | 0.0           | 0.0           | 0.0           | 18.5          | 17.3                   | 16.1                   |
| Vietnam                   | 89.0              | 0.0         | 21.9         | 37.0          | 42.7          | 54.6          | 86.8          | 86.5                   | 86.2                   |
| Yemen                     | 22.8              | 0.0         | 0.0          | 0.0           | 0.0           | 0.0           | 11.7          | 11.3                   | 10.9                   |
| Zambia                    | 13.2              | 0.0         | 0.0          | 1.0           | 2.5           | 4.6           | 8.8           | 8.8                    | 8.8                    |
| Zimbabwe                  | 13.1              | 0.0         | 0.0          | 0.0           | 0.6           | 3.4           | 8.3           | 8.3                    | 8.3                    |
| <b>Total</b>              | <b>6700.1</b>     | <b>9.5</b>  | <b>769.9</b> | <b>1318.5</b> | <b>2014.2</b> | <b>2514.9</b> | <b>5400.5</b> | <b>5271.3</b>          | <b>5143.4</b>          |

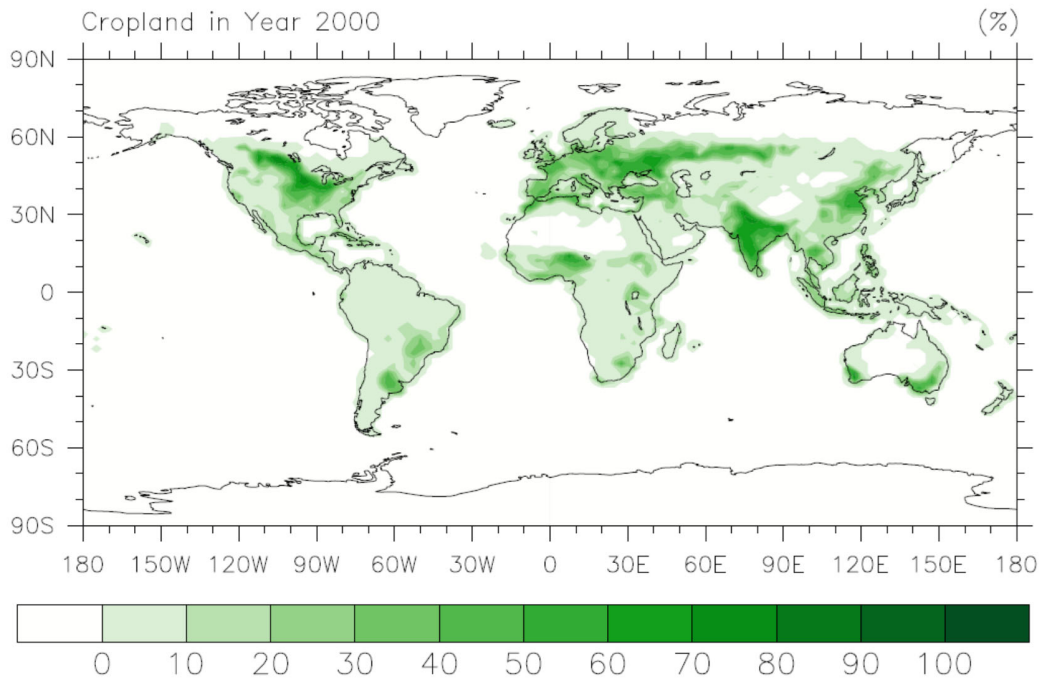

**Figure S1:** Cropland mask used to produce Figure 1 in the main text. Values are percent of each grid box used for crops. This is from land surface data of 2000 used in the Community Earth System Model. The resolution of this land file is 1 degree, and therefore along coastal lines and islands, the green color covers small parts of the ocean.

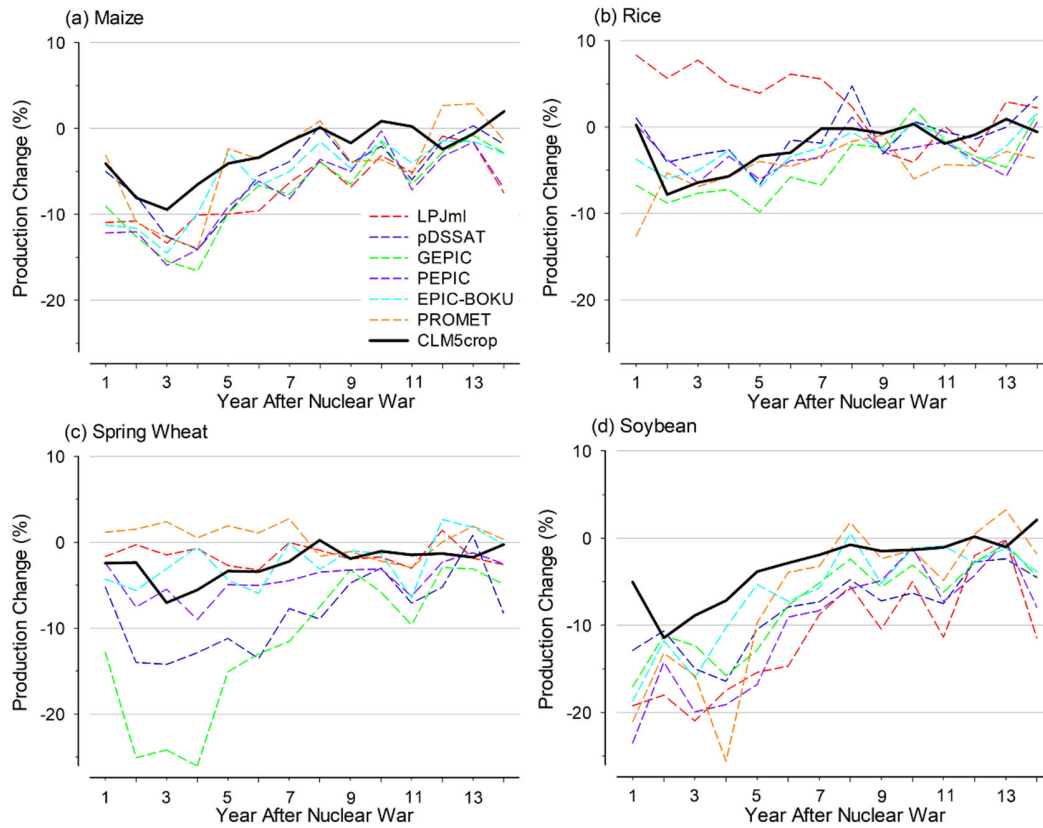

**Figure S2.** Global average crop production changes (%) of maize (a), rice (b), spring wheat (c) and soybean (d) in CLM5crop using raw climate forcing and in six other crop models<sup>11</sup> using the delta downscaling method under the 5 Tg scenario.

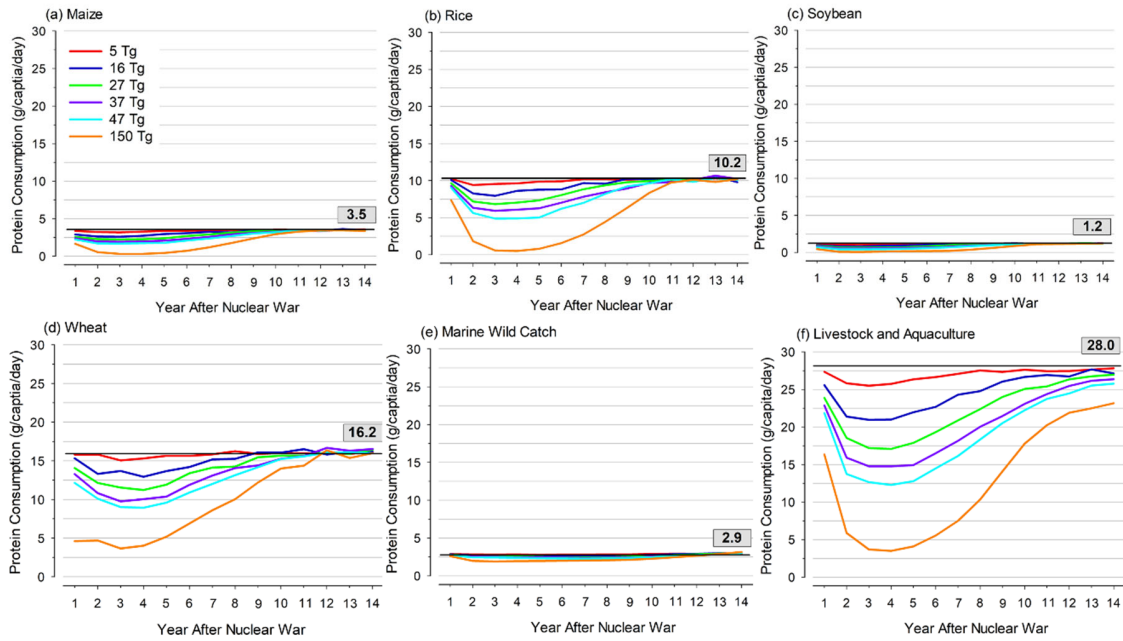

**Figure S3.** Global average annual protein consumption (g/capita/day) for maize, rice, soybean, wheat, marine wild catch, and livestock, aquaculture and inland fish under different nuclear war scenarios. The black lines and numbers in gray boxes are the protein supply in 2010<sup>23</sup>.

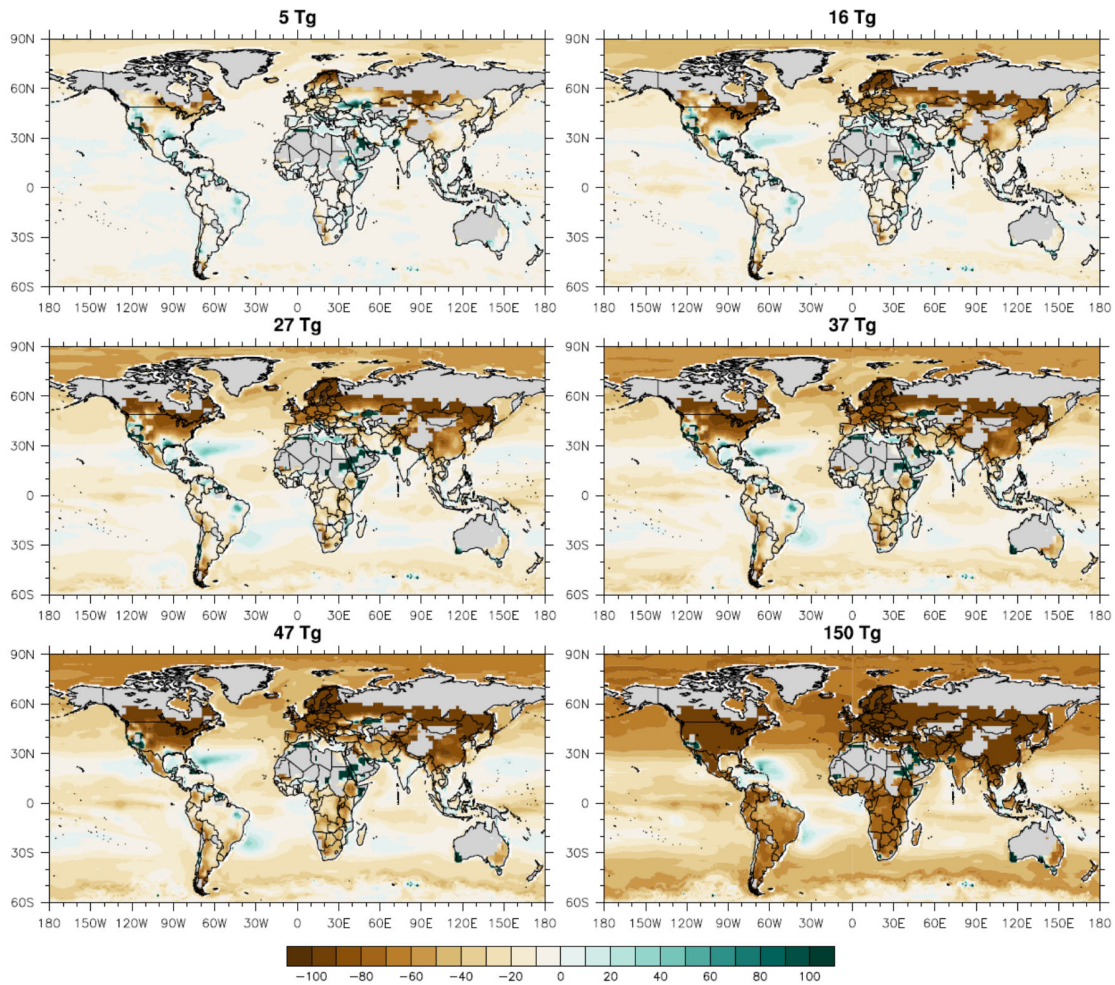

**Figure S4.** Change in calorie production (%) for the explicitly simulated agricultural crops and wild-caught marine fisheries combined. Percent change is for the nuclear war scenarios as compared to the control simulation, averaged for the first five years after the nuclear wars from the four cereals and marine fish we modeled. The dark green regions over the border area between India and Pakistan, and tropical dry regions, have close to zero crop yield in the control simulation with year 2000 climate forcing, and in CLM5crop, those areas have crop land percentage larger than 0 since the resolution is 1 degree. Therefore, those regions have small crop production in the control simulation. When the nuclear war perturbation is applied, those regions still show a low crop yield but higher than the control. Therefore, the percentage is positive and large.

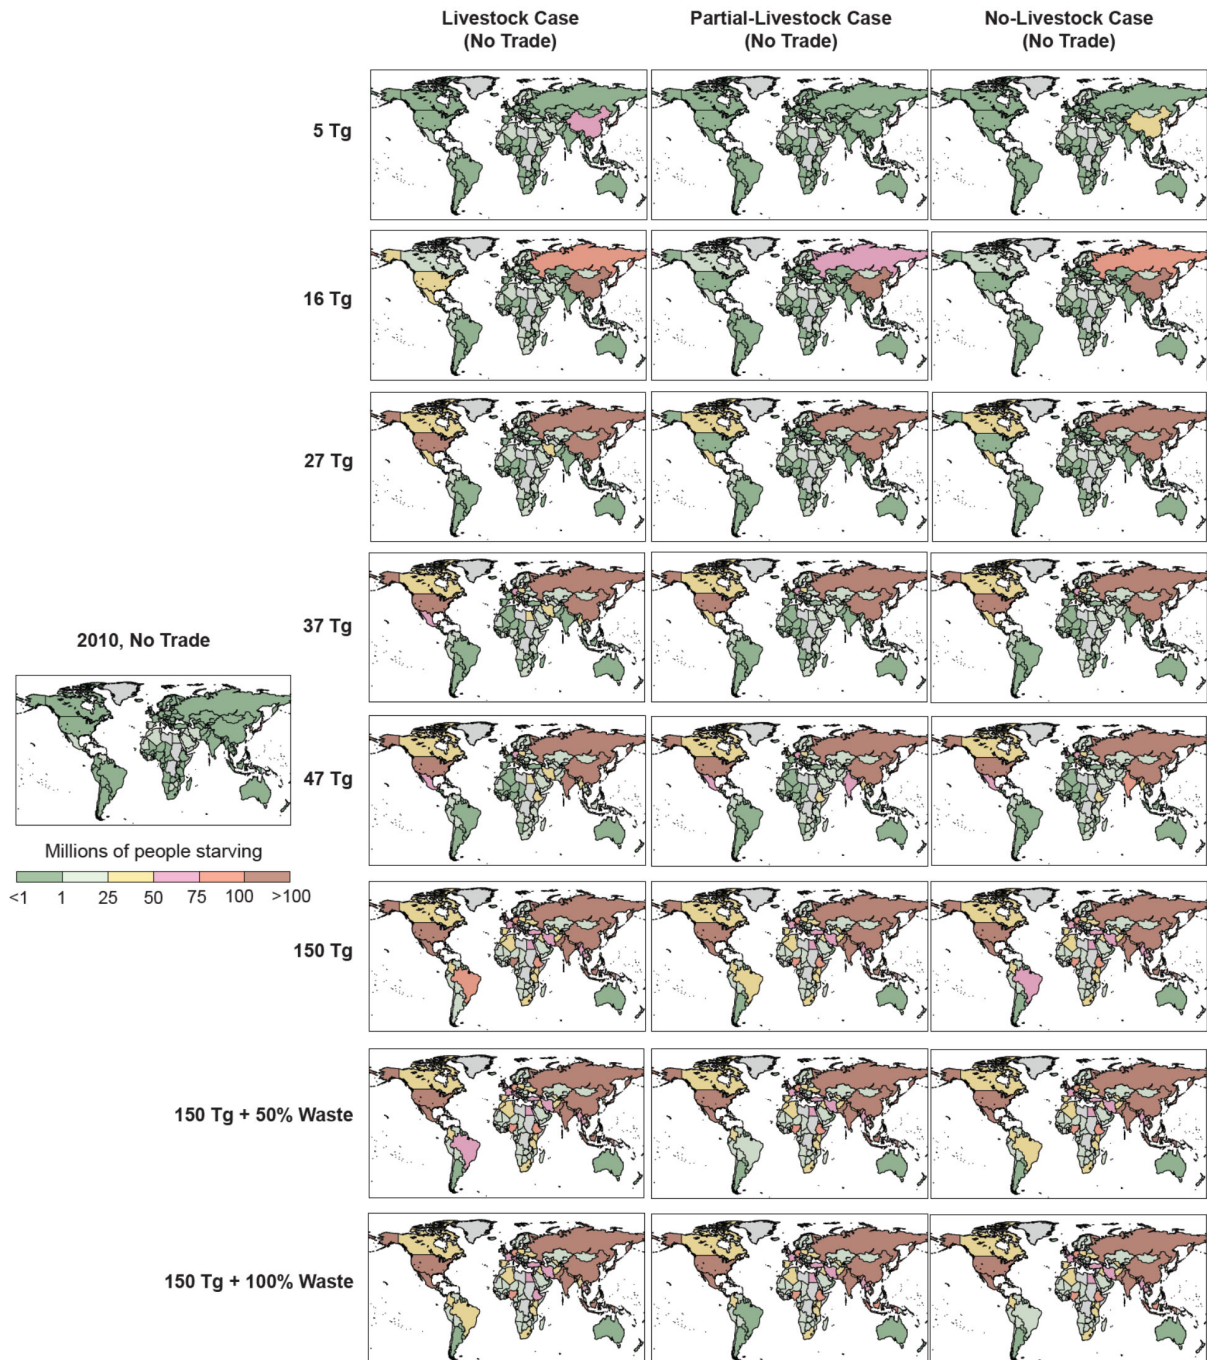

**Figure S5.** Millions of people without food in each country at the end of Year 2 for no international trade and if the available food were divided so that everyone who would survive got the minimum needed to support normal physical activity (1911 kcal/capita/day), and the rest got none. 150 Tg + 50% Waste is half of the household waste added to food consumption, and 150 Tg + 100% Waste is all household waste added to food consumption.

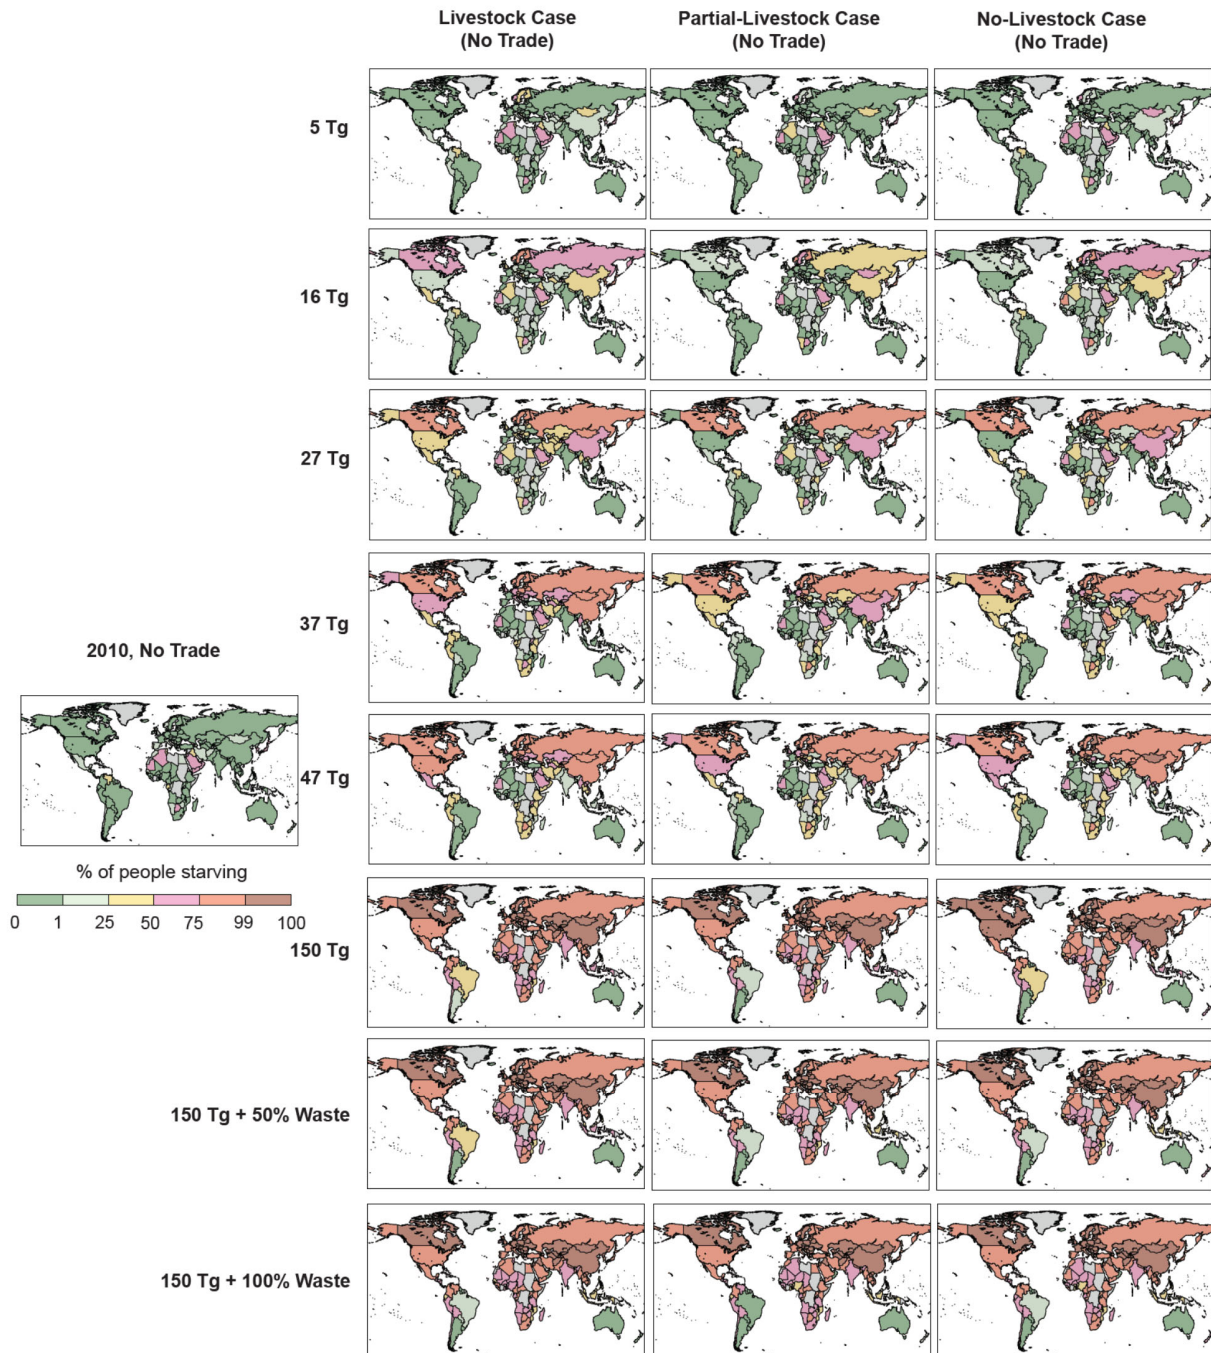

**Figure S6.** Percentage of people without food in each country at the end of Year 2 for no international trade and if the available food were divided so that everyone who would survive got the minimum needed to support normal physical activity (1911 kcal/capita/day), and the rest got none. 150 Tg + 50% Waste is half of the household waste added to food consumption, and 150 Tg + 100% Waste is all household waste added to food consumption.

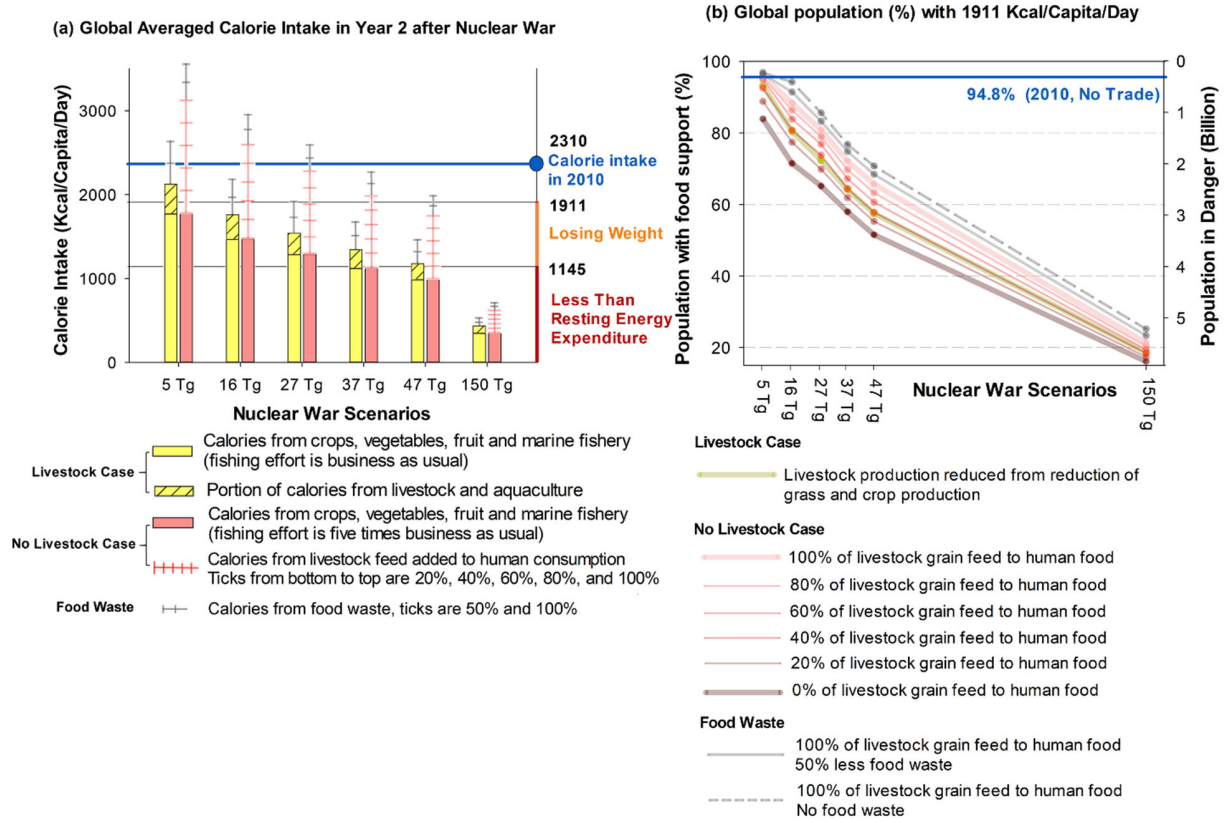

**Figure S7.** Overview of global calorie intake and sensitivity to livestock and trade assumptions. This figure is similar to Figure 5 but with the *No Livestock Case* instead of *Partial Livestock Case*. (a) The global average change in calorie intake per person per day in year 2 post-war under the *Livestock case* (yellow bars), and for the *No Livestock case* (red bars), in which also there are no meat, dairy, or eggs. For the *No Livestock case*, additional calories potentially available by human consumption of animal feed, mainly maize and soybeans, are plotted for various portions of converted animal feed (pink tick marks). Critical food intake levels are marked in the right margin. (b) Without international trade, the global population (%) that could be supported by domestic food production at the end of Year 2 after a nuclear war if they receive the calorie supporting their regular physical activity<sup>27</sup> and the rest of the population would receive no food, under the *Livestock* and *No Livestock cases*. The blue line in (b) shows the percentage of population that can be supported by current food production when food production does not change, but international trade is stopped. National data are calculated first (Tables S4 and S6, Figure S5), and then aggregated to global data.



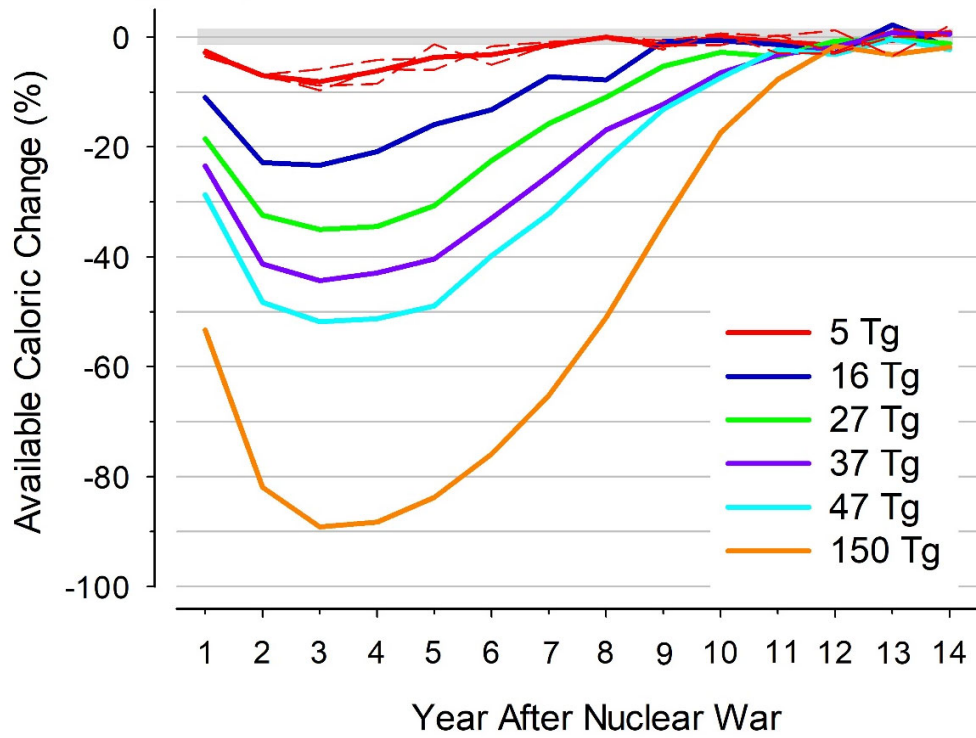

**Figure S8.** Global average annual crop calorie production change (%) (maize, wheat, rice and soybean, weighted by their observed production for 2010 and calorie content). The gray shading is the standard deviation of 45 years of control (3 ensemble control simulation of 15 years). The dashed red lines are the three ensemble members from the 5 Tg simulation.
